# Supplementary material for: A Genome-Wide Association Study of Psoriasis and Psoriatic Arthritis Identifies New Disease Loci
Source: PubMed Central journal article supplement (PMC2274885; doi:10.1371/journal.pgen.1000041), 2008-04-04
Supplement: pgen.1000041.s002.pdf [file pgen.1000041.s002.pdf]

**Supplementary Table 2A. Top ranking hits in all cases used for discovery. MapInfo is location from hg18. OR (odds ratio with the 95% CI). Minor allele frequencies for cases and controls and Trend P values (unadjusted and adjusted by GC) are also provided.**

| RS #       | CHR | MapInfo (bp) | Minor Allele | HW P (controls) | All Cases           |            |               |           |                |
|------------|-----|--------------|--------------|-----------------|---------------------|------------|---------------|-----------|----------------|
|            |     |              |              |                 | OR                  | MAF(cases) | MAF(controls) | Trend P   | Trend P (adj.) |
| rs880051   | 1   | 1483590      | A            | 0.594           | 1.457 [1.120-1.894] | 0.290      | 0.219         | 6.023E-03 | 8.862E-03      |
| rs10914850 | 1   | 34268681     | G            | 1.000           | 1.867 [1.178-2.960] | 0.081      | 0.045         | 7.704E-03 | 1.111E-02      |
| rs4653108  | 1   | 35100619     | A            | 0.762           | 1.594 [1.216-2.091] | 0.258      | 0.179         | 8.118E-04 | 1.420E-03      |
| rs11207808 | 1   | 61919026     | A            | 0.674           | 0.595 [0.453-0.781] | 0.206      | 0.303         | 1.852E-04 | 3.667E-04      |
| rs12130439 | 1   | 61943203     | A            | 0.659           | 0.596 [0.451-0.788] | 0.190      | 0.282         | 2.854E-04 | 5.465E-04      |
| rs1506399  | 1   | 63946072     | C            | 1.000           | 2.616 [1.402-4.879] | 0.050      | 0.020         | 1.946E-03 | 3.152E-03      |
| rs930145   | 1   | 68402118     | G            | 0.705           | 1.706 [1.269-2.292] | 0.211      | 0.135         | 3.672E-04 | 6.873E-04      |
| rs1408668  | 1   | 86264437     | G            | 0.289           | 1.786 [1.368-2.330] | 0.282      | 0.180         | 2.064E-05 | 4.961E-05      |
| rs1356394  | 1   | 102829858    | A            | 0.711           | 0.077 [0.019-0.317] | 0.005      | 0.063         | 4.008E-06 | 1.114E-05      |
| rs316941   | 1   | 104912966    | G            | 0.628           | 1.777 [1.281-2.464] | 0.168      | 0.102         | 6.724E-04 | 1.196E-03      |
| rs12066799 | 1   | 109321084    | A            | 0.590           | 0.617 [0.487-0.782] | 0.343      | 0.458         | 7.166E-05 | 1.542E-04      |
| rs1217401  | 1   | 114240474    | G            | 0.273           | 1.761 [1.389-2.233] | 0.412      | 0.285         | 2.565E-06 | 7.403E-06      |
| rs971173   | 1   | 114249437    | A            | 0.226           | 1.774 [1.399-2.249] | 0.412      | 0.283         | 2.038E-06 | 6.008E-06      |
| rs10494809 | 1   | 198398707    | A            | 0.759           | 1.708 [1.304-2.237] | 0.269      | 0.177         | 9.179E-05 | 1.935E-04      |
| rs7520626  | 1   | 202488465    | C            | 0.132           | 0.644 [0.503-0.823] | 0.287      | 0.384         | 3.490E-04 | 6.546E-04      |
| rs2802846  | 1   | 203249336    | A            | 0.394           | 1.476 [1.163-1.873] | 0.384      | 0.297         | 1.462E-03 | 2.422E-03      |
| rs11800413 | 1   | 235069500    | G            | 0.372           | 1.550 [1.227-1.957] | 0.461      | 0.356         | 2.908E-04 | 5.545E-04      |
| rs6428942  | 1   | 243885338    | G            | 1.000           | 1.513 [1.120-2.044] | 0.194      | 0.137         | 7.267E-03 | 1.053E-02      |
| rs4246561  | 2   | 1142434      | G            | 0.166           | 2.385 [1.498-3.798] | 0.088      | 0.039         | 2.061E-04 | 4.061E-04      |
| rs921322   | 2   | 11237111     | A            | 0.046           | 1.332 [1.060-1.674] | 0.510      | 0.438         | 1.162E-02 | 1.619E-02      |
| rs162330   | 2   | 38173000     | C            | 0.149           | 1.701 [1.347-2.147] | 0.592      | 0.461         | 1.833E-05 | 4.443E-05      |
| rs13032336 | 2   | 67568265     | A            | 0.236           | 1.765 [1.311-2.376] | 0.211      | 0.131         | 8.609E-05 | 1.826E-04      |
| rs1518722  | 2   | 87410648     | C            | 0.617           | 0.053 [0.007-0.389] | 0.003      | 0.047         | 4.225E-05 | 9.527E-05      |
| rs6749984  | 2   | 124156863    | G            | 1.000           | 2.702 [1.671-4.369] | 0.089      | 0.035         | 2.165E-05 | 5.179E-05      |
| rs1439563  | 2   | 188566032    | G            | 0.773           | 1.885 [1.331-2.669] | 0.149      | 0.085         | 2.507E-04 | 4.838E-04      |
| rs13432541 | 2   | 233817248    | A            | 0.642           | 2.067 [1.362-3.137] | 0.104      | 0.053         | 4.946E-04 | 8.995E-04      |
| rs2697135  | 3   | 11052898     | A            | 0.310           | 0.293 [0.169-0.508] | 0.041      | 0.126         | 3.703E-06 | 1.037E-05      |
| rs12487468 | 3   | 51364610     | G            | 1.000           | 2.968 [1.450-6.078] | 0.040      | 0.014         | 1.641E-03 | 2.697E-03      |
| rs1461796  | 3   | 55199120     | A            | 0.548           | 1.712 [1.311-2.237] | 0.275      | 0.181         | 8.812E-05 | 1.862E-04      |
| rs4974135  | 3   | 56353303     | A            | 1.000           | 2.340 [1.255-4.365] | 0.048      | 0.021         | 5.278E-03 | 7.854E-03      |
| rs2193550  | 3   | 70538343     | C            | 0.063           | 1.744 [1.342-2.266] | 0.294      | 0.193         | 2.312E-05 | 5.512E-05      |
| rs1164059  | 3   | 110942724    | A            | 0.753           | 0.596 [0.454-0.782] | 0.214      | 0.313         | 2.084E-04 | 4.101E-04      |

| RS #       | CHR | MapInfo (bp) | Minor Allele | HW P (controls) | All Cases           |            |               |           |                |
|------------|-----|--------------|--------------|-----------------|---------------------|------------|---------------|-----------|----------------|
|            |     |              |              |                 | OR                  | MAF(cases) | MAF(controls) | Trend P   | Trend P (adj.) |
| rs6779681  | 3   | 138884283    | G            | 0.471           | 1.442 [1.123-1.851] | 0.320      | 0.246         | 3.503E-03 | 5.398E-03      |
| rs10513502 | 3   | 158184555    | A            | 0.439           | 2.262 [1.371-3.732] | 0.073      | 0.034         | 1.174E-03 | 1.987E-03      |
| rs3792686  | 4   | 4443969      | G            | 0.313           | 1.597 [1.270-2.007] | 0.535      | 0.419         | 6.670E-05 | 1.448E-04      |
| rs13125385 | 4   | 32113322     | A            | 0.199           | 1.707 [1.177-2.476] | 0.124      | 0.077         | 5.248E-03 | 7.814E-03      |
| rs13151961 | 4   | 123334952    | G            | 0.112           | 0.444 [0.309-0.638] | 0.095      | 0.192         | 1.622E-05 | 3.980E-05      |
| rs6822844  | 4   | 123728871    | A            | 0.054           | 0.459 [0.320-0.660] | 0.095      | 0.186         | 4.253E-05 | 9.620E-05      |
| rs6840978  | 4   | 123774157    | A            | 0.053           | 0.488 [0.352-0.676] | 0.123      | 0.224         | 2.850E-05 | 6.646E-05      |
| rs10519368 | 4   | 136925018    | A            | 0.757           | 2.006 [1.405-2.865] | 0.144      | 0.078         | 1.190E-04 | 2.452E-04      |
| rs2612182  | 4   | 137918325    | A            | 0.298           | 0.073 [0.018-0.299] | 0.006      | 0.071         | 5.836E-06 | 1.569E-05      |
| rs4296721  | 4   | 157328717    | A            | 0.591           | 2.345 [1.492-3.683] | 0.093      | 0.042         | 1.412E-04 | 2.863E-04      |
| rs6835397  | 4   | 187930570    | A            | 0.650           | 0.626 [0.494-0.794] | 0.343      | 0.454         | 8.683E-05 | 1.844E-04      |
| rs10062995 | 5   | 25448500     | A            | 0.075           | 1.527 [1.153-2.022] | 0.232      | 0.165         | 3.069E-03 | 4.782E-03      |
| rs10036252 | 5   | 25487576     | G            | 0.101           | 1.456 [1.040-2.038] | 0.147      | 0.106         | 2.601E-02 | 3.391E-02      |
| rs6883825  | 5   | 36460847     | A            | 0.921           | 1.482 [1.174-1.871] | 0.429      | 0.336         | 9.384E-04 | 1.614E-03      |
| rs10515168 | 5   | 73242423     | A            | 1.000           | 1.739 [1.171-2.581] | 0.109      | 0.066         | 5.846E-03 | 8.627E-03      |
| rs152599   | 5   | 106807204    | A            | 0.023           | 1.626 [1.288-2.052] | 0.464      | 0.347         | 8.319E-05 | 1.774E-04      |
| rs1002916  | 5   | 117962940    | G            | 0.536           | 2.308 [1.445-3.685] | 0.085      | 0.039         | 4.046E-04 | 7.505E-04      |
| rs4129371  | 5   | 120480755    | A            | 0.280           | 1.885 [1.385-2.567] | 0.198      | 0.115         | 8.284E-05 | 1.765E-04      |
| rs13436259 | 5   | 120502430    | A            | 0.353           | 1.976 [1.446-2.701] | 0.194      | 0.109         | 2.727E-05 | 6.395E-05      |
| rs7726945  | 5   | 128062298    | A            | 1.000           | 0.505 [0.366-0.698] | 0.129      | 0.226         | 2.658E-05 | 6.244E-05      |
| rs4868753  | 5   | 164582872    | G            | 0.503           | 1.402 [1.113-1.767] | 0.452      | 0.370         | 3.618E-03 | 5.560E-03      |
| rs4367315  | 5   | 164593117    | G            | 0.923           | 1.401 [1.111-1.766] | 0.453      | 0.371         | 4.157E-03 | 6.313E-03      |
| rs1422680  | 5   | 164598962    | G            | 0.389           | 1.400 [1.112-1.763] | 0.453      | 0.371         | 3.685E-03 | 5.653E-03      |
| rs3846949  | 6   | 15479222     | A            | 0.757           | 1.528 [1.208-1.933] | 0.415      | 0.317         | 3.813E-04 | 7.112E-04      |
| rs4713380  | 6   | 30893252     | G            | 0.057           | 1.833 [1.384-2.427] | 0.246      | 0.151         | 2.795E-05 | 6.551E-05      |
| rs4713385  | 6   | 30895572     | A            | 0.057           | 1.785 [1.344-2.370] | 0.241      | 0.151         | 7.791E-05 | 1.666E-04      |
| rs7756521  | 6   | 30956232     | G            | 1.000           | 1.895 [1.461-2.457] | 0.308      | 0.190         | 1.036E-06 | 3.245E-06      |
| rs1264323  | 6   | 30963886     | A            | 0.781           | 1.609 [1.280-2.023] | 0.519      | 0.401         | 3.449E-05 | 7.937E-05      |
| rs1049623  | 6   | 30972808     | G            | 0.781           | 1.609 [1.280-2.023] | 0.519      | 0.401         | 3.449E-05 | 7.937E-05      |
| rs3873332  | 6   | 31003969     | G            | 1.000           | 1.906 [1.441-2.520] | 0.256      | 0.153         | 4.095E-06 | 1.135E-05      |
| rs3873334  | 6   | 31004126     | A            | 0.749           | 1.776 [1.352-2.333] | 0.263      | 0.167         | 3.130E-05 | 7.245E-05      |
| rs2532924  | 6   | 31040661     | A            | 0.783           | 0.565 [0.442-0.721] | 0.291      | 0.421         | 5.422E-06 | 1.468E-05      |
| rs3871466  | 6   | 31091662     | G            | 0.430           | 1.823 [1.354-2.453] | 0.213      | 0.129         | 8.327E-05 | 1.774E-04      |
| rs2523898  | 6   | 31101512     | A            | 0.417           | 0.553 [0.435-0.703] | 0.336      | 0.478         | 6.184E-07 | 2.031E-06      |
| rs3130955  | 6   | 31162490     | A            | 0.211           | 1.579 [1.254-1.987] | 0.476      | 0.365         | 5.495E-05 | 1.212E-04      |

| RS #       | CHR | MapInfo (bp) | Minor Allele | HW P (controls) | All Cases           |            |               |           |                |
|------------|-----|--------------|--------------|-----------------|---------------------|------------|---------------|-----------|----------------|
|            |     |              |              |                 | OR                  | MAF(cases) | MAF(controls) | Trend P   | Trend P (adj.) |
| rs2233956  | 6   | 31189184     | G            | 0.879           | 1.739 [1.330-2.275] | 0.277      | 0.181         | 5.197E-05 | 1.155E-04      |
| rs3094211  | 6   | 31194381     | G            | 0.904           | 0.509 [0.369-0.703] | 0.142      | 0.245         | 4.148E-05 | 9.391E-05      |
| rs3094205  | 6   | 31199841     | G            | 0.838           | 1.584 [1.254-2.001] | 0.431      | 0.324         | 9.650E-05 | 2.031E-04      |
| rs3131003  | 6   | 31201461     | A            | 0.928           | 1.658 [1.318-2.085] | 0.564      | 0.438         | 1.335E-05 | 3.335E-05      |
| rs3815087  | 6   | 31201566     | A            | 0.443           | 1.946 [1.516-2.499] | 0.362      | 0.225         | 1.292E-07 | 4.865E-07      |
| rs746647   | 6   | 31222161     | G            | 0.413           | 1.677 [1.328-2.118] | 0.441      | 0.320         | 8.885E-06 | 2.298E-05      |
| rs1265112  | 6   | 31225998     | G            | 0.413           | 1.677 [1.328-2.118] | 0.441      | 0.320         | 8.885E-06 | 2.298E-05      |
| rs130065   | 6   | 31230479     | A            | 0.295           | 1.935 [1.501-2.496] | 0.355      | 0.221         | 6.420E-07 | 2.100E-06      |
| rs3130453  | 6   | 31232828     | G            | 0.284           | 0.531 [0.420-0.672] | 0.358      | 0.512         | 6.545E-08 | 2.627E-07      |
| rs720465   | 6   | 31233756     | A            | 0.396           | 1.949 [1.540-2.466] | 0.457      | 0.301         | 1.266E-08 | 5.879E-08      |
| rs1419881  | 6   | 31238572     | A            | 0.786           | 1.576 [1.254-1.982] | 0.554      | 0.441         | 9.363E-05 | 1.973E-04      |
| rs1265159  | 6   | 31248026     | A            | 0.614           | 2.075 [1.623-2.654] | 0.383      | 0.230         | 3.384E-09 | 1.766E-08      |
| rs3130473  | 6   | 31307187     | A            | 0.573           | 1.943 [1.531-2.465] | 0.422      | 0.273         | 6.819E-08 | 2.715E-07      |
| rs3130685  | 6   | 31314185     | A            | 0.786           | 1.582 [1.258-1.990] | 0.557      | 0.443         | 7.954E-05 | 1.698E-04      |
| rs2394963  | 6   | 31359441     | A            | 0.144           | 0.619 [0.467-0.821] | 0.189      | 0.273         | 1.123E-03 | 1.910E-03      |
| rs3873379  | 6   | 31370148     | G            | 0.177           | 0.633 [0.479-0.838] | 0.193      | 0.274         | 1.724E-03 | 2.822E-03      |
| rs2894207  | 6   | 31371730     | G            | 0.895           | 1.903 [1.480-2.446] | 0.345      | 0.217         | 3.735E-07 | 1.279E-06      |
| rs9366778  | 6   | 31377152     | A            | 0.136           | 0.572 [0.447-0.734] | 0.275      | 0.398         | 1.658E-05 | 4.057E-05      |
| rs10484554 | 6   | 31382534     | A            | 0.234           | 2.509 [1.922-3.275] | 0.320      | 0.158         | 8.747E-12 | 7.804E-11      |
| rs2523619  | 6   | 31426123     | G            | 0.809           | 1.688 [1.317-2.162] | 0.353      | 0.244         | 2.787E-05 | 6.519E-05      |
| rs2596503  | 6   | 31428789     | A            | 1.000           | 0.446 [0.298-0.667] | 0.079      | 0.162         | 7.870E-05 | 1.682E-04      |
| rs2523608  | 6   | 31430538     | G            | 0.565           | 1.706 [1.354-2.150] | 0.500      | 0.369         | 4.003E-06 | 1.114E-05      |
| rs7743761  | 6   | 31444079     | A            | 0.718           | 1.738 [1.360-2.222] | 0.362      | 0.246         | 1.769E-05 | 4.318E-05      |
| rs2523535  | 6   | 31444229     | G            | 0.781           | 0.582 [0.455-0.745] | 0.283      | 0.404         | 1.598E-05 | 3.924E-05      |
| rs2844529  | 6   | 31461572     | A            | 0.433           | 1.733 [1.375-2.183] | 0.483      | 0.351         | 4.397E-06 | 1.214E-05      |
| rs2428486  | 6   | 31462083     | G            | 0.433           | 1.750 [1.389-2.204] | 0.486      | 0.351         | 2.902E-06 | 8.297E-06      |
| rs13437082 | 6   | 31462539     | A            | 0.642           | 2.208 [1.738-2.806] | 0.433      | 0.257         | 1.399E-10 | 9.698E-10      |
| rs4711269  | 6   | 31462798     | A            | 0.642           | 2.257 [1.778-2.866] | 0.438      | 0.257         | 4.009E-11 | 3.116E-10      |
| rs2523467  | 6   | 31470909     | A            | 0.327           | 1.698 [1.346-2.142] | 0.478      | 0.351         | 1.128E-05 | 2.862E-05      |
| rs1051794  | 6   | 31487088     | A            | 0.408           | 1.715 [1.357-2.168] | 0.438      | 0.313         | 7.128E-06 | 1.881E-05      |
| rs1131896  | 6   | 31487094     | A            | 0.103           | 0.536 [0.397-0.724] | 0.158      | 0.259         | 6.976E-05 | 1.505E-04      |
| rs7772549  | 6   | 31515622     | G            | 0.264           | 1.702 [1.347-2.151] | 0.452      | 0.326         | 1.128E-05 | 2.862E-05      |
| rs9469003  | 6   | 31515807     | G            | 0.281           | 2.030 [1.535-2.685] | 0.258      | 0.146         | 9.161E-07 | 2.896E-06      |
| rs2596480  | 6   | 31533964     | A            | 0.606           | 0.321 [0.181-0.569] | 0.033      | 0.097         | 3.548E-05 | 8.130E-05      |
| rs2395029  | 6   | 31539759     | C            | 1.000           | 3.190 [2.025-5.023] | 0.107      | 0.036         | 1.432E-07 | 5.345E-07      |

| RS #       | CHR | MapInfo (bp) | Minor Allele | HW P (controls) | All Cases           |            |               |           |                |
|------------|-----|--------------|--------------|-----------------|---------------------|------------|---------------|-----------|----------------|
|            |     |              |              |                 | OR                  | MAF(cases) | MAF(controls) | Trend P   | Trend P (adj.) |
| rs2248462  | 6   | 31554775     | A            | 0.901           | 1.697 [1.323-2.178] | 0.342      | 0.234         | 3.048E-05 | 7.073E-05      |
| rs2516509  | 6   | 31557973     | G            | 0.901           | 1.691 [1.316-2.172] | 0.341      | 0.234         | 3.919E-05 | 8.907E-05      |
| rs2844509  | 6   | 31618903     | G            | 0.738           | 1.607 [1.263-2.044] | 0.381      | 0.277         | 1.323E-04 | 2.702E-04      |
| rs9368699  | 6   | 31910520     | G            | 1.000           | 2.664 [1.700-4.173] | 0.100      | 0.040         | 5.103E-06 | 1.387E-05      |
| rs12198173 | 6   | 32134786     | A            | 0.594           | 2.143 [1.542-2.977] | 0.178      | 0.092         | 4.064E-06 | 1.130E-05      |
| rs13199524 | 6   | 32174743     | A            | 0.571           | 2.203 [1.577-3.076] | 0.175      | 0.088         | 2.767E-06 | 7.949E-06      |
| rs12153855 | 6   | 32182782     | G            | 0.819           | 1.941 [1.417-2.659] | 0.190      | 0.108         | 2.812E-05 | 6.582E-05      |
| rs3096697  | 6   | 32242488     | A            | 0.194           | 1.592 [1.233-2.056] | 0.311      | 0.221         | 2.691E-04 | 5.179E-04      |
| rs3134945  | 6   | 32254470     | A            | 0.156           | 1.564 [1.211-2.021] | 0.309      | 0.222         | 4.744E-04 | 8.692E-04      |
| rs8192591  | 6   | 32293774     | A            | 1.000           | 2.689 [1.679-4.308] | 0.092      | 0.036         | 1.183E-05 | 2.988E-05      |
| rs2395185  | 6   | 32541145     | A            | 0.832           | 1.677 [1.322-2.126] | 0.418      | 0.300         | 2.156E-05 | 5.154E-05      |
| rs560788   | 6   | 52938820     | A            | 0.523           | 1.590 [1.265-1.999] | 0.535      | 0.420         | 6.564E-05 | 1.428E-04      |
| rs10484710 | 6   | 56213713     | A            | 0.110           | N.D.                | 0.000      | 0.062         | 2.280E-06 | 6.669E-06      |
| rs346298   | 6   | 80630001     | A            | 0.075           | 1.444 [1.118-1.866] | 0.300      | 0.229         | 6.839E-03 | 9.958E-03      |
| rs7754913  | 6   | 132423548    | C            | 0.689           | 1.814 [1.345-2.447] | 0.209      | 0.127         | 1.043E-04 | 2.173E-04      |
| rs12182899 | 6   | 148982366    | G            | 0.904           | 0.582 [0.432-0.784] | 0.159      | 0.245         | 2.702E-04 | 5.179E-04      |
| rs6557200  | 6   | 150314225    | G            | 0.108           | 1.782 [1.339-2.372] | 0.236      | 0.147         | 3.701E-05 | 8.449E-05      |
| rs4719601  | 7   | 2610133      | A            | 0.541           | 0.602 [0.462-0.784] | 0.223      | 0.323         | 1.595E-04 | 3.201E-04      |
| rs10244600 | 7   | 16206679     | C            | 0.085           | 1.603 [1.262-2.035] | 0.406      | 0.299         | 2.438E-04 | 4.722E-04      |
| rs1404398  | 7   | 16628533     | A            | 0.292           | 1.609 [1.203-2.152] | 0.220      | 0.149         | 2.156E-03 | 3.462E-03      |
| rs156301   | 7   | 24190049     | A            | 0.312           | 0.557 [0.419-0.741] | 0.180      | 0.283         | 7.097E-05 | 1.535E-04      |
| rs12535722 | 7   | 129259292    | A            | 1.000           | 0.262 [0.130-0.526] | 0.023      | 0.084         | 5.457E-05 | 1.206E-04      |
| rs1484646  | 8   | 10065806     | A            | 0.202           | 0.550 [0.416-0.727] | 0.192      | 0.302         | 1.329E-05 | 3.319E-05      |
| rs4150895  | 8   | 86292487     | A            | 0.619           | N.D.                | 0.000      | 0.048         | 1.295E-05 | 3.241E-05      |
| rs39519    | 8   | 90915209     | A            | 1.000           | 1.603 [1.274-2.018] | 0.483      | 0.368         | 4.989E-05 | 1.111E-04      |
| rs1827656  | 8   | 122260569    | A            | 1.000           | 1.842 [1.203-2.820] | 0.095      | 0.054         | 4.353E-03 | 6.586E-03      |
| rs1847547  | 8   | 122260683    | A            | 1.000           | 1.970 [1.272-3.050] | 0.093      | 0.049         | 2.079E-03 | 3.350E-03      |
| rs4733741  | 8   | 130857730    | A            | 0.701           | 0.604 [0.469-0.779] | 0.258      | 0.365         | 9.581E-05 | 2.011E-04      |
| rs7024449  | 9   | 691026       | A            | 0.369           | 0.737 [0.573-0.949] | 0.271      | 0.336         | 2.115E-02 | 2.803E-02      |
| rs4740820  | 9   | 5600381      | A            | 1.000           | 1.365 [1.066-1.747] | 0.331      | 0.266         | 1.429E-02 | 1.957E-02      |
| rs7042098  | 9   | 27815454     | A            | 0.447           | 1.429 [1.124-1.818] | 0.367      | 0.289         | 3.798E-03 | 5.812E-03      |
| rs823918   | 9   | 103703117    | C            | 0.069           | 1.864 [1.385-2.509] | 0.216      | 0.128         | 6.319E-05 | 1.380E-04      |
| rs10793992 | 9   | 133139159    | A            | 0.194           | 0.618 [0.484-0.788] | 0.300      | 0.410         | 7.607E-05 | 1.634E-04      |
| rs10901365 | 9   | 133150374    | A            | 0.263           | 0.605 [0.472-0.775] | 0.289      | 0.402         | 4.659E-05 | 1.044E-04      |
| rs1382580  | 10  | 23372821     | G            | 0.358           | 0.428 [0.281-0.653] | 0.066      | 0.142         | 4.686E-05 | 1.049E-04      |

| RS #       | CHR | MapInfo (bp) | Minor Allele | HW P (controls) | All Cases           |            |               |           |                |
|------------|-----|--------------|--------------|-----------------|---------------------|------------|---------------|-----------|----------------|
|            |     |              |              |                 | OR                  | MAF(cases) | MAF(controls) | Trend P   | Trend P (adj.) |
| rs384037   | 11  | 2869129      | G            | 0.083           | 0.799 [0.633-1.009] | 0.374      | 0.428         | 5.684E-02 | 6.955E-02      |
| rs1365057  | 11  | 35066251     | A            | 0.793           | 1.416 [1.091-1.837] | 0.280      | 0.215         | 7.885E-03 | 1.134E-02      |
| rs11605924 | 11  | 45829667     | A            | 0.204           | 0.613 [0.483-0.778] | 0.382      | 0.502         | 8.836E-05 | 1.871E-04      |
| rs1447170  | 11  | 57632797     | G            | 0.279           | 2.116 [1.460-3.067] | 0.135      | 0.069         | 6.890E-05 | 1.491E-04      |
| rs10736719 | 11  | 61756322     | G            | 0.410           | 1.558 [1.233-1.971] | 0.419      | 0.317         | 1.835E-04 | 3.649E-04      |
| rs3850942  | 11  | 63364623     | G            | 0.106           | 2.150 [1.400-3.301] | 0.100      | 0.049         | 3.669E-04 | 6.873E-04      |
| rs495366   | 11  | 102200318    | A            | 0.477           | 1.637 [1.281-2.091] | 0.355      | 0.252         | 7.940E-05 | 1.698E-04      |
| rs2661969  | 11  | 134223427    | G            | 0.895           | 1.529 [1.180-1.980] | 0.293      | 0.213         | 1.313E-03 | 2.204E-03      |
| rs1040092  | 12  | 58052436     | A            | 0.823           | 1.447 [1.044-2.007] | 0.156      | 0.113         | 2.968E-02 | 3.826E-02      |
| rs7957738  | 12  | 58057308     | A            | 1.000           | 1.473 [1.070-2.028] | 0.167      | 0.119         | 1.794E-02 | 2.411E-02      |
| rs1607784  | 12  | 76246319     | A            | 0.456           | 1.902 [1.373-2.635] | 0.174      | 0.100         | 8.783E-05 | 1.862E-04      |
| rs995030   | 12  | 87414802     | A            | 0.337           | 1.733 [1.318-2.279] | 0.258      | 0.167         | 9.925E-05 | 2.080E-04      |
| rs1022034  | 12  | 87442874     | A            | 0.337           | 1.744 [1.326-2.294] | 0.259      | 0.167         | 8.251E-05 | 1.757E-04      |
| rs3782181  | 12  | 87477692     | C            | 0.444           | 1.771 [1.354-2.316] | 0.275      | 0.176         | 3.517E-05 | 8.052E-05      |
| rs3886972  | 12  | 92161554     | A            | 0.245           | 2.902 [1.662-5.068] | 0.066      | 0.024         | 1.314E-04 | 2.689E-04      |
| rs10840624 | 12  | 120785682    | G            | 0.703           | 1.620 [1.287-2.039] | 0.493      | 0.375         | 3.714E-05 | 8.489E-05      |
| rs2760908  | 13  | 26844485     | G            | 0.897           | 1.372 [1.058-1.779] | 0.280      | 0.221         | 1.800E-02 | 2.418E-02      |
| rs12864419 | 13  | 28053904     | C            | 0.717           | 0.602 [0.474-0.766] | 0.321      | 0.439         | 4.175E-05 | 9.436E-05      |
| rs1186468  | 13  | 38847162     | A            | 0.545           | 0.577 [0.443-0.753] | 0.220      | 0.329         | 4.180E-05 | 9.436E-05      |
| rs4514547  | 13  | 39136899     | G            | 0.923           | 0.586 [0.453-0.758] | 0.245      | 0.357         | 4.829E-05 | 1.080E-04      |
| rs4569133  | 13  | 39137044     | A            | 0.923           | 0.579 [0.447-0.749] | 0.243      | 0.357         | 3.343E-05 | 7.712E-05      |
| rs7993214  | 13  | 39248912     | A            | 0.629           | 0.586 [0.454-0.756] | 0.249      | 0.361         | 4.681E-05 | 1.049E-04      |
| rs9533755  | 13  | 43530210     | G            | 0.725           | 2.095 [1.447-3.034] | 0.136      | 0.070         | 7.099E-05 | 1.535E-04      |
| rs288726   | 13  | 106292420    | A            | 1.000           | 1.517 [1.159-1.984] | 0.261      | 0.189         | 2.678E-03 | 4.221E-03      |
| rs8018041  | 14  | 24520721     | G            | 0.850           | 1.446 [1.067-1.961] | 0.189      | 0.139         | 1.935E-02 | 2.583E-02      |
| rs1958589  | 14  | 33914127     | G            | 0.406           | 1.451 [1.053-2.000] | 0.166      | 0.120         | 2.018E-02 | 2.684E-02      |
| rs847506   | 14  | 35538760     | A            | 1.000           | 1.996 [1.391-2.864] | 0.140      | 0.076         | 9.012E-05 | 1.907E-04      |
| rs7153045  | 14  | 55911652     | G            | 0.097           | 1.583 [1.256-1.996] | 0.464      | 0.354         | 5.488E-05 | 1.212E-04      |
| rs1189046  | 14  | 55929403     | A            | 0.464           | 0.653 [0.513-0.831] | 0.324      | 0.423         | 4.156E-04 | 7.691E-04      |
| rs2128673  | 14  | 56358349     | A            | 0.271           | 1.836 [1.345-2.505] | 0.195      | 0.117         | 9.378E-05 | 1.973E-04      |
| rs431649   | 14  | 67647645     | G            | 0.033           | 1.606 [1.223-2.108] | 0.258      | 0.178         | 8.349E-04 | 1.456E-03      |
| rs372143   | 14  | 67657091     | G            | 0.033           | 1.585 [1.208-2.081] | 0.256      | 0.178         | 1.146E-03 | 1.938E-03      |
| rs2588833  | 14  | 67669245     | A            | 0.065           | 1.596 [1.216-2.095] | 0.256      | 0.177         | 9.368E-04 | 1.614E-03      |
| rs2588832  | 14  | 67672520     | C            | 0.076           | 1.619 [1.238-2.117] | 0.268      | 0.184         | 5.492E-04 | 9.921E-04      |
| rs1742501  | 14  | 68398902     | G            | 0.735           | 1.796 [1.232-2.617] | 0.123      | 0.073         | 2.808E-03 | 4.409E-03      |

| RS #       | CHR | MapInfo (bp) | Minor Allele | HW P (controls) | All Cases           |            |               |           |                |
|------------|-----|--------------|--------------|-----------------|---------------------|------------|---------------|-----------|----------------|
|            |     |              |              |                 | OR                  | MAF(cases) | MAF(controls) | Trend P   | Trend P (adj.) |
| rs17126387 | 14  | 89371067     | C            | 1.000           | 3.162 [1.980-5.049] | 0.102      | 0.035         | 6.275E-07 | 2.051E-06      |
| rs6575501  | 14  | 94710082     | A            | 1.000           | 2.211 [1.443-3.387] | 0.102      | 0.049         | 1.648E-04 | 3.296E-04      |
| rs11637031 | 15  | 48576417     | G            | 0.737           | 1.738 [1.315-2.297] | 0.246      | 0.158         | 8.884E-05 | 1.880E-04      |
| rs8037553  | 15  | 48577525     | G            | 1.000           | 1.798 [1.357-2.383] | 0.244      | 0.152         | 4.240E-05 | 9.573E-05      |
| rs4775912  | 15  | 49068271     | G            | 0.856           | 1.698 [1.272-2.267] | 0.223      | 0.144         | 3.444E-04 | 6.482E-04      |
| rs3803369  | 15  | 49163121     | A            | 0.855           | 1.759 [1.319-2.346] | 0.227      | 0.143         | 1.239E-04 | 2.549E-04      |
| rs893576   | 15  | 49224953     | G            | 1.000           | 1.603 [1.192-2.154] | 0.206      | 0.139         | 1.571E-03 | 2.592E-03      |
| rs4775919  | 15  | 49233201     | G            | 1.000           | 1.649 [1.229-2.214] | 0.211      | 0.139         | 7.267E-04 | 1.281E-03      |
| rs8041933  | 15  | 49405038     | A            | 0.880           | 1.378 [1.044-1.818] | 0.236      | 0.183         | 2.279E-02 | 3.002E-02      |
| rs288579   | 16  | 61135127     | G            | 0.323           | 1.964 [1.423-2.711] | 0.180      | 0.101         | 5.633E-05 | 1.241E-04      |
| rs12447462 | 16  | 63038923     | G            | 0.805           | 1.954 [1.413-2.701] | 0.178      | 0.100         | 4.686E-05 | 1.049E-04      |
| rs7193343  | 16  | 71586661     | A            | 1.000           | 0.635 [0.453-0.889] | 0.120      | 0.176         | 8.140E-03 | 1.168E-02      |
| rs8059522  | 16  | 78014317     | G            | 0.597           | 1.791 [1.350-2.377] | 0.239      | 0.149         | 4.274E-05 | 9.620E-05      |
| rs4782905  | 16  | 82813923     | A            | 0.744           | 0.212 [0.091-0.491] | 0.017      | 0.074         | 8.336E-05 | 1.774E-04      |
| rs2240601  | 17  | 53106111     | A            | 0.065           | 1.636 [1.248-2.145] | 0.261      | 0.177         | 4.077E-04 | 7.542E-04      |
| rs1941384  | 18  | 23988934     | A            | 0.856           | 1.539 [1.146-2.065] | 0.206      | 0.144         | 3.959E-03 | 6.036E-03      |
| rs713042   | 19  | 1308082      | A            | 0.228           | 1.798 [1.377-2.346] | 0.285      | 0.181         | 1.272E-05 | 3.194E-05      |
| rs3826942  | 19  | 1311575      | G            | 0.532           | 1.646 [1.281-2.115] | 0.331      | 0.231         | 9.378E-05 | 1.973E-04      |
| rs8109578  | 19  | 10074154     | A            | 1.000           | 0.223 [0.116-0.432] | 0.026      | 0.108         | 2.397E-06 | 6.960E-06      |
| rs1629174  | 19  | 44578058     | A            | 1.000           | 2.222 [1.421-3.474] | 0.092      | 0.044         | 3.224E-04 | 6.083E-04      |
| rs2210455  | 20  | 9867383      | A            | 1.000           | 1.585 [1.205-2.084] | 0.254      | 0.176         | 9.887E-04 | 1.696E-03      |
| rs6089151  | 20  | 30080496     | A            | 0.711           | N.D.                | 0.000      | 0.063         | 2.932E-07 | 1.029E-06      |
| rs6057638  | 20  | 30802993     | A            | 0.342           | 1.544 [1.169-2.038] | 0.239      | 0.169         | 1.578E-03 | 2.603E-03      |
| rs6141829  | 20  | 30902870     | G            | 0.393           | 1.604 [1.205-2.134] | 0.225      | 0.153         | 7.536E-04 | 1.326E-03      |
| rs2000291  | 20  | 30923196     | A            | 0.582           | 1.797 [1.348-2.396] | 0.230      | 0.142         | 3.865E-05 | 8.780E-05      |
| rs1936307  | 20  | 30993189     | A            | 0.245           | 1.521 [1.189-1.946] | 0.360      | 0.270         | 9.401E-04 | 1.622E-03      |
| rs2827771  | 21  | 23231640     | G            | 1.000           | 1.618 [1.187-2.205] | 0.188      | 0.125         | 1.993E-03 | 3.222E-03      |
| rs2829505  | 21  | 25307597     | A            | 0.848           | 1.590 [1.263-2.003] | 0.486      | 0.372         | 8.287E-05 | 1.765E-04      |
| rs3746887  | 21  | 39954610     | A            | 0.786           | 0.503 [0.357-0.709] | 0.116      | 0.207         | 9.380E-05 | 1.973E-04      |
| rs2041629  | 22  | 15937144     | A            | 0.370           | 1.402 [1.065-1.846] | 0.239      | 0.183         | 1.777E-02 | 2.391E-02      |
| rs433576   | 22  | 16828960     | A            | 0.114           | 0.591 [0.433-0.807] | 0.159      | 0.242         | 1.657E-03 | 2.722E-03      |
| rs390407   | 22  | 21588231     | G            | 0.340           | 0.626 [0.469-0.837] | 0.175      | 0.252         | 1.427E-03 | 2.374E-03      |
| rs740234   | 22  | 29338745     | G            | 0.869           | 1.709 [1.295-2.255] | 0.249      | 0.162         | 1.079E-04 | 2.248E-04      |
| rs5916793  | X   | 107034204    | C            | 1.000           | 3.361 [1.422-7.944] | 0.040      | 0.012         | 3.999E-05 | 9.080E-05      |
| rs4933045  | XY  | 214201       | A            | 0.392           | 1.524 [1.198-1.940] | 0.397      | 0.301         | 6.460E-04 | 1.150E-03      |



**Supplementary Table 2B. Top ranking hits in stratified subsets of cases with psoriasis but no arthritis. MapInfo is location from hg18. OR (odds ratio with the 95% CI). Minor allele frequencies for cases and controls and Trend P values (unadjusted and adjusted by GC) are also provided.**

| RS #       | CHR | Location (bp) | Minor Allele | HW P (controls) | Psoriasis           |             |                |           |                 |
|------------|-----|---------------|--------------|-----------------|---------------------|-------------|----------------|-----------|-----------------|
|            |     |               |              |                 | OR                  | MAF (cases) | MAF (controls) | Trend P   | Trend P (corr.) |
| rs880051   | 1   | 1483590       | A            | 0.594           | 1.112 [0.799-1.547] | 0.238       | 0.219          | 5.399E-01 | 5.527E-01       |
| rs10914850 | 1   | 34268681      | G            | 1.000           | 2.640 [1.612-4.325] | 0.110       | 0.045          | 8.370E-05 | 1.396E-04       |
| rs4653108  | 1   | 35100619      | A            | 0.762           | 1.918 [1.401-2.626] | 0.295       | 0.179          | 4.800E-05 | 8.241E-05       |
| rs11207808 | 1   | 61919026      | A            | 0.674           | 0.494 [0.349-0.701] | 0.177       | 0.303          | 7.130E-05 | 1.196E-04       |
| rs12130439 | 1   | 61943203      | A            | 0.659           | 0.462 [0.320-0.668] | 0.153       | 0.282          | 3.490E-05 | 6.121E-05       |
| rs1506399  | 1   | 63946072      | C            | 1.000           | 3.559 [1.836-6.900] | 0.067       | 0.020          | 8.121E-05 | 1.355E-04       |
| rs930145   | 1   | 68402118      | G            | 0.705           | 2.061 [1.469-2.891] | 0.244       | 0.135          | 2.826E-05 | 5.021E-05       |
| rs1408668  | 1   | 86264437      | G            | 0.289           | 1.799 [1.310-2.469] | 0.283       | 0.180          | 2.950E-04 | 4.565E-04       |
| rs1356394  | 1   | 102829858     | A            | 0.711           | 0.064 [0.009-0.464] | 0.004       | 0.063          | 2.309E-04 | 3.624E-04       |
| rs316941   | 1   | 104912966     | G            | 0.628           | 1.404 [0.930-2.118] | 0.138       | 0.102          | 1.118E-01 | 1.236E-01       |
| rs12066799 | 1   | 109321084     | A            | 0.590           | 0.627 [0.471-0.835] | 0.346       | 0.458          | 1.369E-03 | 1.932E-03       |
| rs1217401  | 1   | 114240474     | G            | 0.273           | 1.741 [1.309-2.315] | 0.409       | 0.285          | 1.449E-04 | 2.333E-04       |
| rs971173   | 1   | 114249437     | A            | 0.226           | 1.753 [1.318-2.332] | 0.409       | 0.283          | 1.237E-04 | 2.008E-04       |
| rs10494809 | 1   | 198398707     | A            | 0.759           | 1.613 [1.165-2.233] | 0.258       | 0.177          | 3.849E-03 | 5.126E-03       |
| rs7520626  | 1   | 202488465     | C            | 0.132           | 0.551 [0.404-0.750] | 0.256       | 0.384          | 8.687E-05 | 1.445E-04       |
| rs2802846  | 1   | 203249336     | A            | 0.394           | 1.213 [0.905-1.626] | 0.339       | 0.297          | 1.887E-01 | 2.031E-01       |
| rs11800413 | 1   | 235069500     | G            | 0.372           | 1.309 [0.986-1.739] | 0.420       | 0.356          | 6.587E-02 | 7.488E-02       |
| rs6428942  | 1   | 243885338     | G            | 1.000           | 1.104 [0.748-1.629] | 0.150       | 0.137          | 6.171E-01 | 6.282E-01       |
| rs4246561  | 2   | 1142434       | G            | 0.166           | 1.786 [0.993-3.213] | 0.067       | 0.039          | 5.750E-02 | 6.585E-02       |
| rs921322   | 2   | 11237111      | A            | 0.046           | 1.042 [0.789-1.376] | 0.448       | 0.438          | 7.616E-01 | 7.689E-01       |
| rs162330   | 2   | 38173000      | C            | 0.149           | 1.617 [1.222-2.141] | 0.580       | 0.461          | 1.285E-03 | 1.827E-03       |
| rs13032336 | 2   | 67568265      | A            | 0.236           | 1.741 [1.222-2.481] | 0.209       | 0.131          | 1.216E-03 | 1.727E-03       |
| rs1518722  | 2   | 87410648      | C            | 0.617           | N.D.                | 0.000       | 0.047          | 5.753E-04 | 8.572E-04       |
| rs6749984  | 2   | 124156863     | G            | 1.000           | 2.399 [1.356-4.244] | 0.079       | 0.035          | 1.932E-03 | 2.677E-03       |
| rs1439563  | 2   | 188566032     | G            | 0.773           | 2.189 [1.473-3.253] | 0.169       | 0.085          | 6.199E-05 | 1.051E-04       |
| rs13432541 | 2   | 233817248     | A            | 0.642           | 1.600 [0.946-2.706] | 0.083       | 0.053          | 7.624E-02 | 8.601E-02       |
| rs2697135  | 3   | 11052898      | A            | 0.310           | 0.192 [0.083-0.441] | 0.027       | 0.126          | 1.118E-05 | 2.096E-05       |
| rs12487468 | 3   | 51364610      | G            | 1.000           | 2.004 [0.800-5.018] | 0.028       | 0.014          | 1.270E-01 | 1.394E-01       |
| rs1461796  | 3   | 55199120      | A            | 0.548           | 1.752 [1.275-2.407] | 0.279       | 0.181          | 5.676E-04 | 8.443E-04       |
| rs4974135  | 3   | 56353303      | A            | 1.000           | 1.337 [0.562-3.182] | 0.028       | 0.021          | 5.046E-01 | 5.181E-01       |
| rs2193550  | 3   | 70538343      | C            | 0.063           | 1.790 [1.311-2.443] | 0.299       | 0.193          | 1.651E-04 | 2.643E-04       |
| rs1164059  | 3   | 110942724     | A            | 0.753           | 0.491 [0.346-0.697] | 0.183       | 0.313          | 6.415E-05 | 1.083E-04       |

| RS #       | CHR | Location (bp) | Minor Allele | HW P (controls) | Psoriasis           |             |                |           |                 |
|------------|-----|---------------|--------------|-----------------|---------------------|-------------|----------------|-----------|-----------------|
|            |     |               |              |                 | OR                  | MAF (cases) | MAF (controls) | Trend P   | Trend P (corr.) |
| rs6779681  | 3   | 138884283     | G            | 0.471           | 1.770 [1.321-2.373] | 0.366       | 0.246          | 8.481E-05 | 1.410E-04       |
| rs10513502 | 3   | 158184555     | A            | 0.439           | 1.539 [0.800-2.961] | 0.051       | 0.034          | 1.948E-01 | 2.093E-01       |
| rs3792686  | 4   | 4443969       | G            | 0.313           | 1.728 [1.309-2.280] | 0.555       | 0.419          | 1.259E-04 | 2.049E-04       |
| rs13125385 | 4   | 32113322      | A            | 0.199           | 1.217 [0.747-1.983] | 0.092       | 0.077          | 4.389E-01 | 4.536E-01       |
| rs13151961 | 4   | 123334952     | G            | 0.112           | 0.364 [0.224-0.590] | 0.079       | 0.192          | 4.338E-05 | 7.500E-05       |
| rs6822844  | 4   | 123728871     | A            | 0.054           | 0.416 [0.261-0.663] | 0.087       | 0.186          | 2.808E-04 | 4.363E-04       |
| rs6840978  | 4   | 123774157     | A            | 0.053           | 0.413 [0.270-0.632] | 0.106       | 0.224          | 6.331E-05 | 1.072E-04       |
| rs10519368 | 4   | 136925018     | A            | 0.757           | 2.285 [1.522-3.431] | 0.161       | 0.078          | 4.919E-05 | 8.448E-05       |
| rs2612182  | 4   | 137918325     | A            | 0.298           | 0.118 [0.029-0.486] | 0.009       | 0.071          | 6.765E-04 | 9.977E-04       |
| rs4296721  | 4   | 157328717     | A            | 0.591           | 1.657 [0.927-2.963] | 0.067       | 0.042          | 8.345E-02 | 9.370E-02       |
| rs6835397  | 4   | 187930570     | A            | 0.650           | 0.558 [0.416-0.749] | 0.317       | 0.454          | 7.428E-05 | 1.245E-04       |
| rs10062995 | 5   | 25448500      | A            | 0.075           | 1.207 [0.848-1.718] | 0.193       | 0.165          | 2.877E-01 | 3.031E-01       |
| rs10036252 | 5   | 25487576      | G            | 0.101           | 0.964 [0.613-1.516] | 0.102       | 0.106          | 8.681E-01 | 8.722E-01       |
| rs6883825  | 5   | 36460847      | A            | 0.921           | 1.824 [1.380-2.410] | 0.480       | 0.336          | 2.096E-05 | 3.788E-05       |
| rs10515168 | 5   | 73242423      | A            | 1.000           | 1.215 [0.722-2.044] | 0.079       | 0.066          | 4.690E-01 | 4.832E-01       |
| rs152599   | 5   | 106807204     | A            | 0.023           | 1.651 [1.246-2.188] | 0.468       | 0.347          | 7.201E-04 | 1.055E-03       |
| rs1002916  | 5   | 117962940     | G            | 0.536           | 1.775 [0.987-3.192] | 0.067       | 0.039          | 5.586E-02 | 6.407E-02       |
| rs4129371  | 5   | 120480755     | A            | 0.280           | 1.693 [1.165-2.459] | 0.181       | 0.115          | 7.294E-03 | 9.368E-03       |
| rs13436259 | 5   | 120502430     | A            | 0.353           | 1.764 [1.208-2.576] | 0.177       | 0.109          | 4.334E-03 | 5.734E-03       |
| rs7726945  | 5   | 128062298     | A            | 1.000           | 0.590 [0.403-0.862] | 0.147       | 0.226          | 5.914E-03 | 7.687E-03       |
| rs4868753  | 5   | 164582872     | G            | 0.503           | 1.122 [0.846-1.487] | 0.398       | 0.370          | 4.158E-01 | 4.307E-01       |
| rs4367315  | 5   | 164593117     | G            | 0.923           | 1.119 [0.843-1.484] | 0.398       | 0.371          | 4.332E-01 | 4.478E-01       |
| rs1422680  | 5   | 164598962     | G            | 0.389           | 1.136 [0.858-1.506] | 0.402       | 0.371          | 3.626E-01 | 3.780E-01       |
| rs3846949  | 6   | 15479222      | A            | 0.757           | 1.757 [1.327-2.326] | 0.449       | 0.317          | 7.404E-05 | 1.245E-04       |
| rs4713380  | 6   | 30893252      | G            | 0.057           | 1.772 [1.266-2.478] | 0.240       | 0.151          | 1.042E-03 | 1.498E-03       |
| rs4713385  | 6   | 30895572      | A            | 0.057           | 1.690 [1.200-2.382] | 0.232       | 0.151          | 3.350E-03 | 4.498E-03       |
| rs7756521  | 6   | 30956232      | G            | 1.000           | 1.886 [1.384-2.571] | 0.307       | 0.190          | 5.483E-05 | 9.376E-05       |
| rs1264323  | 6   | 30963886      | A            | 0.781           | 1.515 [1.149-1.997] | 0.504       | 0.401          | 2.559E-03 | 3.489E-03       |
| rs1049623  | 6   | 30972808      | G            | 0.781           | 1.515 [1.149-1.997] | 0.504       | 0.401          | 2.559E-03 | 3.489E-03       |
| rs3873332  | 6   | 31003969      | G            | 1.000           | 1.905 [1.369-2.651] | 0.256       | 0.153          | 1.227E-04 | 1.998E-04       |
| rs3873334  | 6   | 31004126      | A            | 0.749           | 1.747 [1.261-2.420] | 0.260       | 0.167          | 8.718E-04 | 1.266E-03       |
| rs2532924  | 6   | 31040661      | A            | 0.783           | 0.564 [0.419-0.760] | 0.291       | 0.421          | 2.005E-04 | 3.165E-04       |
| rs3871466  | 6   | 31091662      | G            | 0.430           | 1.689 [1.181-2.416] | 0.201       | 0.129          | 4.284E-03 | 5.672E-03       |
| rs2523898  | 6   | 31101512      | A            | 0.417           | 0.560 [0.418-0.752] | 0.339       | 0.478          | 7.093E-05 | 1.190E-04       |
| rs3130955  | 6   | 31162490      | A            | 0.211           | 1.604 [1.215-2.118] | 0.480       | 0.365          | 4.948E-04 | 7.403E-04       |



| RS #       | CHR | Location (bp) | Minor Allele | HW P (controls) | Psoriasis           |             |                |           |                 |
|------------|-----|---------------|--------------|-----------------|---------------------|-------------|----------------|-----------|-----------------|
|            |     |               |              |                 | OR                  | MAF (cases) | MAF (controls) | Trend P   | Trend P (corr.) |
| rs2233956  | 6   | 31189184      | G            | 0.879           | 1.658 [1.201-2.288] | 0.268       | 0.181          | 1.940E-03 | 2.688E-03       |
| rs3094211  | 6   | 31194381      | G            | 0.904           | 0.557 [0.378-0.822] | 0.153       | 0.245          | 3.239E-03 | 4.356E-03       |
| rs3094205  | 6   | 31199841      | G            | 0.838           | 1.648 [1.244-2.182] | 0.441       | 0.324          | 4.366E-04 | 6.592E-04       |
| rs3131003  | 6   | 31201461      | A            | 0.928           | 1.651 [1.251-2.180] | 0.563       | 0.438          | 3.670E-04 | 5.611E-04       |
| rs3815087  | 6   | 31201566      | A            | 0.443           | 1.918 [1.426-2.580] | 0.358       | 0.225          | 1.156E-05 | 2.170E-05       |
| rs746647   | 6   | 31222161      | G            | 0.413           | 1.625 [1.227-2.154] | 0.433       | 0.320          | 5.150E-04 | 7.709E-04       |
| rs1265112  | 6   | 31225998      | G            | 0.413           | 1.625 [1.227-2.154] | 0.433       | 0.320          | 5.150E-04 | 7.709E-04       |
| rs130065   | 6   | 31230479      | A            | 0.295           | 1.813 [1.336-2.459] | 0.340       | 0.221          | 1.620E-04 | 2.591E-04       |
| rs3130453  | 6   | 31232828      | G            | 0.284           | 0.560 [0.422-0.743] | 0.370       | 0.512          | 3.559E-05 | 6.243E-05       |
| rs720465   | 6   | 31233756      | A            | 0.396           | 1.818 [1.367-2.416] | 0.439       | 0.301          | 2.008E-05 | 3.642E-05       |
| rs1419881  | 6   | 31238572      | A            | 0.786           | 1.531 [1.161-2.019] | 0.547       | 0.441          | 2.192E-03 | 3.016E-03       |
| rs1265159  | 6   | 31248026      | A            | 0.614           | 1.915 [1.424-2.576] | 0.364       | 0.230          | 1.088E-05 | 2.045E-05       |
| rs3130473  | 6   | 31307187      | A            | 0.573           | 1.729 [1.297-2.305] | 0.394       | 0.273          | 1.976E-04 | 3.134E-04       |
| rs3130685  | 6   | 31314185      | A            | 0.786           | 1.594 [1.208-2.104] | 0.559       | 0.443          | 7.510E-04 | 1.099E-03       |
| rs2394963  | 6   | 31359441      | A            | 0.144           | 0.812 [0.588-1.122] | 0.234       | 0.273          | 2.187E-01 | 2.336E-01       |
| rs3873379  | 6   | 31370148      | G            | 0.177           | 0.828 [0.601-1.142] | 0.238       | 0.274          | 2.624E-01 | 2.778E-01       |
| rs2894207  | 6   | 31371730      | G            | 0.895           | 1.903 [1.409-2.568] | 0.345       | 0.217          | 2.222E-05 | 4.000E-05       |
| rs9366778  | 6   | 31377152      | A            | 0.136           | 0.682 [0.508-0.915] | 0.311       | 0.398          | 1.251E-02 | 1.558E-02       |
| rs10484554 | 6   | 31382534      | A            | 0.234           | 2.497 [1.823-3.420] | 0.319       | 0.158          | 1.041E-08 | 2.976E-08       |
| rs2523619  | 6   | 31426123      | G            | 0.809           | 1.725 [1.281-2.324] | 0.358       | 0.244          | 2.940E-04 | 4.542E-04       |
| rs2596503  | 6   | 31428789      | A            | 1.000           | 0.469 [0.288-0.764] | 0.083       | 0.162          | 2.135E-03 | 2.941E-03       |
| rs2523608  | 6   | 31430538      | G            | 0.565           | 1.846 [1.399-2.436] | 0.520       | 0.369          | 1.001E-05 | 1.890E-05       |
| rs7743761  | 6   | 31444079      | A            | 0.718           | 1.762 [1.313-2.364] | 0.365       | 0.246          | 2.157E-04 | 3.395E-04       |
| rs2523535  | 6   | 31444229      | G            | 0.781           | 0.517 [0.380-0.703] | 0.260       | 0.404          | 2.197E-05 | 3.961E-05       |
| rs2844529  | 6   | 31461572      | A            | 0.433           | 1.852 [1.403-2.446] | 0.500       | 0.351          | 1.728E-05 | 3.156E-05       |
| rs2428486  | 6   | 31462083      | G            | 0.433           | 1.852 [1.403-2.446] | 0.500       | 0.351          | 1.728E-05 | 3.156E-05       |
| rs13437082 | 6   | 31462539      | A            | 0.642           | 2.313 [1.738-3.079] | 0.444       | 0.257          | 1.080E-08 | 3.079E-08       |
| rs4711269  | 6   | 31462798      | A            | 0.642           | 2.354 [1.771-3.131] | 0.449       | 0.257          | 4.832E-09 | 1.442E-08       |
| rs2523467  | 6   | 31470909      | A            | 0.327           | 1.823 [1.378-2.411] | 0.496       | 0.351          | 3.375E-05 | 5.942E-05       |
| rs1051794  | 6   | 31487088      | A            | 0.408           | 1.789 [1.351-2.370] | 0.449       | 0.313          | 5.585E-05 | 9.517E-05       |
| rs1131896  | 6   | 31487094      | A            | 0.103           | 0.656 [0.464-0.928] | 0.186       | 0.259          | 1.937E-02 | 2.354E-02       |
| rs7772549  | 6   | 31515622      | G            | 0.264           | 1.789 [1.351-2.368] | 0.464       | 0.326          | 6.213E-05 | 1.051E-04       |
| rs9469003  | 6   | 31515807      | G            | 0.281           | 2.131 [1.535-2.960] | 0.268       | 0.146          | 7.698E-06 | 1.478E-05       |
| rs2596480  | 6   | 31533964      | A            | 0.606           | 0.344 [0.171-0.690] | 0.035       | 0.097          | 1.451E-03 | 2.044E-03       |
| rs2395029  | 6   | 31539759      | C            | 1.000           | 3.444 [2.068-5.736] | 0.114       | 0.036          | 6.232E-07 | 1.389E-06       |

| RS #       | CHR | Location (bp) | Minor Allele | HW P (controls) | Psoriasis           |             |                |           |                 |
|------------|-----|---------------|--------------|-----------------|---------------------|-------------|----------------|-----------|-----------------|
|            |     |               |              |                 | OR                  | MAF (cases) | MAF (controls) | Trend P   | Trend P (corr.) |
| rs2248462  | 6   | 31554775      | A            | 0.901           | 1.782 [1.324-2.398] | 0.353       | 0.234          | 1.293E-04 | 2.100E-04       |
| rs2516509  | 6   | 31557973      | G            | 0.901           | 1.778 [1.320-2.395] | 0.352       | 0.234          | 1.495E-04 | 2.404E-04       |
| rs2844509  | 6   | 31618903      | G            | 0.738           | 1.805 [1.355-2.405] | 0.409       | 0.277          | 5.771E-05 | 9.805E-05       |
| rs9368699  | 6   | 31910520      | G            | 1.000           | 3.106 [1.885-5.119] | 0.114       | 0.040          | 1.674E-06 | 3.513E-06       |
| rs12198173 | 6   | 32134786      | A            | 0.594           | 2.251 [1.535-3.299] | 0.185       | 0.092          | 2.326E-05 | 4.182E-05       |
| rs13199524 | 6   | 32174743      | A            | 0.571           | 2.363 [1.608-3.473] | 0.185       | 0.088          | 8.500E-06 | 1.623E-05       |
| rs12153855 | 6   | 32182782      | G            | 0.819           | 1.983 [1.370-2.871] | 0.193       | 0.108          | 2.414E-04 | 3.772E-04       |
| rs3096697  | 6   | 32242488      | A            | 0.194           | 1.357 [0.991-1.857] | 0.278       | 0.221          | 4.877E-02 | 5.635E-02       |
| rs3134945  | 6   | 32254470      | A            | 0.156           | 1.321 [0.962-1.812] | 0.274       | 0.222          | 7.495E-02 | 8.462E-02       |
| rs8192591  | 6   | 32293774      | A            | 1.000           | 2.851 [1.667-4.876] | 0.097       | 0.036          | 4.429E-05 | 7.650E-05       |
| rs2395185  | 6   | 32541145      | A            | 0.832           | 1.772 [1.332-2.357] | 0.431       | 0.300          | 9.716E-05 | 1.604E-04       |
| rs560788   | 6   | 52938820      | A            | 0.523           | 1.516 [1.150-1.998] | 0.524       | 0.420          | 2.652E-03 | 3.610E-03       |
| rs10484710 | 6   | 56213713      | A            | 0.110           | N.D.                | 0.000       | 0.062          | 2.602E-04 | 4.047E-04       |
| rs346298   | 6   | 80630001      | A            | 0.075           | 1.076 [0.778-1.488] | 0.242       | 0.229          | 6.671E-01 | 6.770E-01       |
| rs7754913  | 6   | 132423548     | C            | 0.689           | 1.569 [1.087-2.265] | 0.186       | 0.127          | 1.683E-02 | 2.062E-02       |
| rs12182899 | 6   | 148982366     | G            | 0.904           | 0.428 [0.287-0.641] | 0.122       | 0.245          | 2.092E-05 | 3.788E-05       |
| rs6557200  | 6   | 150314225     | G            | 0.108           | 1.670 [1.183-2.357] | 0.224       | 0.147          | 2.543E-03 | 3.468E-03       |
| rs4719601  | 7   | 2610133       | A            | 0.541           | 0.752 [0.552-1.024] | 0.264       | 0.323          | 6.699E-02 | 7.610E-02       |
| rs10244600 | 7   | 16206679      | C            | 0.085           | 1.844 [1.387-2.451] | 0.440       | 0.299          | 5.177E-05 | 8.878E-05       |
| rs1404398  | 7   | 16628533      | A            | 0.292           | 1.198 [0.826-1.738] | 0.173       | 0.149          | 3.612E-01 | 3.766E-01       |
| rs156301   | 7   | 24190049      | A            | 0.312           | 0.591 [0.419-0.834] | 0.189       | 0.283          | 3.099E-03 | 4.180E-03       |
| rs12535722 | 7   | 129259292     | A            | 1.000           | 0.421 [0.209-0.850] | 0.037       | 0.084          | 1.254E-02 | 1.562E-02       |
| rs1484646  | 8   | 10065806      | A            | 0.202           | 0.516 [0.365-0.730] | 0.182       | 0.302          | 1.033E-04 | 1.695E-04       |
| rs4150895  | 8   | 86292487      | A            | 0.619           | N.D.                | 0.000       | 0.048          | 7.293E-04 | 1.071E-03       |
| rs39519    | 8   | 90915209      | A            | 1.000           | 1.559 [1.181-2.058] | 0.476       | 0.368          | 1.539E-03 | 2.162E-03       |
| rs1827656  | 8   | 122260569     | A            | 1.000           | 1.262 [0.718-2.217] | 0.067       | 0.054          | 4.174E-01 | 4.322E-01       |
| rs1847547  | 8   | 122260683     | A            | 1.000           | 1.380 [0.781-2.440] | 0.067       | 0.049          | 2.675E-01 | 2.830E-01       |
| rs4733741  | 8   | 130857730     | A            | 0.701           | 0.660 [0.487-0.895] | 0.276       | 0.365          | 7.583E-03 | 9.719E-03       |
| rs7024449  | 9   | 691026        | A            | 0.369           | 1.013 [0.757-1.355] | 0.339       | 0.336          | 9.312E-01 | 9.333E-01       |
| rs4740820  | 9   | 5600381       | A            | 1.000           | 1.785 [1.337-2.384] | 0.393       | 0.266          | 9.730E-05 | 1.604E-04       |
| rs7042098  | 9   | 27815454      | A            | 0.447           | 1.763 [1.327-2.343] | 0.417       | 0.289          | 8.032E-05 | 1.341E-04       |
| rs823918   | 9   | 103703117     | C            | 0.069           | 2.052 [1.453-2.898] | 0.232       | 0.128          | 6.586E-05 | 1.110E-04       |
| rs10793992 | 9   | 133139159     | A            | 0.194           | 0.577 [0.427-0.779] | 0.286       | 0.410          | 2.341E-04 | 3.660E-04       |
| rs10901365 | 9   | 133150374     | A            | 0.263           | 0.591 [0.436-0.799] | 0.284       | 0.402          | 4.688E-04 | 7.039E-04       |
| rs1382580  | 10  | 23372821      | G            | 0.358           | 0.571 [0.356-0.915] | 0.087       | 0.142          | 1.631E-02 | 2.002E-02       |

| RS #       | CHR | Location (bp) | Minor Allele | HW P (controls) | Psoriasis           |             |                |           |                 |
|------------|-----|---------------|--------------|-----------------|---------------------|-------------|----------------|-----------|-----------------|
|            |     |               |              |                 | OR                  | MAF (cases) | MAF (controls) | Trend P   | Trend P (corr.) |
| rs384037   | 11  | 2869129       | G            | 0.083           | 1.087 [0.824-1.434] | 0.449       | 0.428          | 5.464E-01 | 5.591E-01       |
| rs1365057  | 11  | 35066251      | A            | 0.793           | 1.835 [1.358-2.479] | 0.335       | 0.215          | 6.178E-05 | 1.046E-04       |
| rs11605924 | 11  | 45829667      | A            | 0.204           | 0.647 [0.485-0.864] | 0.395       | 0.502          | 4.067E-03 | 5.399E-03       |
| rs1447170  | 11  | 57632797      | G            | 0.279           | 2.023 [1.303-3.142] | 0.130       | 0.069          | 1.746E-03 | 2.434E-03       |
| rs10736719 | 11  | 61756322      | G            | 0.410           | 1.729 [1.305-2.290] | 0.445       | 0.317          | 9.714E-05 | 1.604E-04       |
| rs3850942  | 11  | 63364623      | G            | 0.106           | 1.572 [0.909-2.722] | 0.075       | 0.049          | 1.094E-01 | 1.211E-01       |
| rs495366   | 11  | 102200318     | A            | 0.477           | 1.715 [1.280-2.297] | 0.366       | 0.252          | 3.120E-04 | 4.800E-04       |
| rs2661969  | 11  | 134223427     | G            | 0.895           | 1.813 [1.339-2.455] | 0.329       | 0.213          | 8.905E-05 | 1.474E-04       |
| rs1040092  | 12  | 58052436      | A            | 0.823           | 0.967 [0.624-1.499] | 0.110       | 0.113          | 8.852E-01 | 8.888E-01       |
| rs7957738  | 12  | 58057308      | A            | 1.000           | 0.987 [0.644-1.511] | 0.118       | 0.119          | 9.513E-01 | 9.528E-01       |
| rs1607784  | 12  | 76246319      | A            | 0.456           | 1.965 [1.340-2.882] | 0.179       | 0.100          | 3.920E-04 | 5.960E-04       |
| rs995030   | 12  | 87414802      | A            | 0.337           | 1.641 [1.181-2.282] | 0.248       | 0.167          | 3.792E-03 | 5.054E-03       |
| rs1022034  | 12  | 87442874      | A            | 0.337           | 1.624 [1.166-2.261] | 0.246       | 0.167          | 4.878E-03 | 6.410E-03       |
| rs3782181  | 12  | 87477692      | C            | 0.444           | 1.607 [1.161-2.224] | 0.256       | 0.176          | 4.766E-03 | 6.271E-03       |
| rs3886972  | 12  | 92161554      | A            | 0.245           | 3.872 [2.134-7.027] | 0.087       | 0.024          | 3.531E-06 | 7.111E-06       |
| rs10840624 | 12  | 120785682     | G            | 0.703           | 1.516 [1.149-2.001] | 0.476       | 0.375          | 2.963E-03 | 4.006E-03       |
| rs2760908  | 13  | 26844485      | G            | 0.897           | 1.023 [0.735-1.423] | 0.224       | 0.221          | 8.965E-01 | 8.997E-01       |
| rs12864419 | 13  | 28053904      | C            | 0.717           | 0.558 [0.414-0.750] | 0.304       | 0.439          | 1.211E-04 | 1.968E-04       |
| rs1186468  | 13  | 38847162      | A            | 0.545           | 0.539 [0.387-0.749] | 0.209       | 0.329          | 1.796E-04 | 2.864E-04       |
| rs4514547  | 13  | 39136899      | G            | 0.923           | 0.558 [0.407-0.766] | 0.236       | 0.357          | 2.826E-04 | 4.385E-04       |
| rs4569133  | 13  | 39137044      | A            | 0.923           | 0.552 [0.401-0.759] | 0.234       | 0.357          | 2.332E-04 | 3.660E-04       |
| rs7993214  | 13  | 39248912      | A            | 0.629           | 0.559 [0.408-0.766] | 0.240       | 0.361          | 3.031E-04 | 4.681E-04       |
| rs9533755  | 13  | 43530210      | G            | 0.725           | 2.369 [1.554-3.613] | 0.151       | 0.070          | 4.320E-05 | 7.463E-05       |
| rs288726   | 13  | 106292420     | A            | 1.000           | 1.189 [0.848-1.667] | 0.216       | 0.189          | 3.208E-01 | 3.363E-01       |
| rs8018041  | 14  | 24520721      | G            | 0.850           | 1.982 [1.410-2.786] | 0.242       | 0.139          | 9.972E-05 | 1.645E-04       |
| rs1958589  | 14  | 33914127      | G            | 0.406           | 1.990 [1.394-2.841] | 0.214       | 0.120          | 9.608E-05 | 1.589E-04       |
| rs847506   | 14  | 35538760      | A            | 1.000           | 2.082 [1.368-3.168] | 0.146       | 0.076          | 3.755E-04 | 5.725E-04       |
| rs7153045  | 14  | 55911652      | G            | 0.097           | 1.465 [1.108-1.937] | 0.445       | 0.354          | 5.331E-03 | 6.972E-03       |
| rs1189046  | 14  | 55929403      | A            | 0.464           | 0.788 [0.590-1.051] | 0.366       | 0.423          | 9.528E-02 | 1.062E-01       |
| rs2128673  | 14  | 56358349      | A            | 0.271           | 1.873 [1.298-2.702] | 0.198       | 0.117          | 6.940E-04 | 1.018E-03       |
| rs431649   | 14  | 67647645      | G            | 0.033           | 1.975 [1.441-2.707] | 0.300       | 0.178          | 2.952E-05 | 5.224E-05       |
| rs372143   | 14  | 67657091      | G            | 0.033           | 1.931 [1.410-2.644] | 0.295       | 0.178          | 5.257E-05 | 9.011E-05       |
| rs2588833  | 14  | 67669245      | A            | 0.065           | 1.944 [1.420-2.663] | 0.295       | 0.177          | 4.141E-05 | 7.173E-05       |
| rs2588832  | 14  | 67672520      | C            | 0.076           | 1.926 [1.410-2.630] | 0.303       | 0.184          | 4.566E-05 | 7.881E-05       |
| rs1742501  | 14  | 68398902      | G            | 0.735           | 0.975 [0.570-1.666] | 0.071       | 0.073          | 9.265E-01 | 9.288E-01       |

| RS #       | CHR | Location (bp) | Minor Allele | HW P (controls) | Psoriasis           |             |                |           |                 |
|------------|-----|---------------|--------------|-----------------|---------------------|-------------|----------------|-----------|-----------------|
|            |     |               |              |                 | OR                  | MAF (cases) | MAF (controls) | Trend P   | Trend P (corr.) |
| rs17126387 | 14  | 89371067      | C            | 1.000           | 3.216 [1.891-5.469] | 0.104       | 0.035          | 7.426E-06 | 1.428E-05       |
| rs6575501  | 14  | 94710082      | A            | 1.000           | 2.709 [1.689-4.347] | 0.122       | 0.049          | 1.672E-05 | 3.064E-05       |
| rs11637031 | 15  | 48576417      | G            | 0.737           | 1.644 [1.175-2.299] | 0.236       | 0.158          | 3.452E-03 | 4.626E-03       |
| rs8037553  | 15  | 48577525      | G            | 1.000           | 1.685 [1.201-2.365] | 0.232       | 0.152          | 2.536E-03 | 3.459E-03       |
| rs4775912  | 15  | 49068271      | G            | 0.856           | 1.345 [0.936-1.932] | 0.185       | 0.144          | 1.107E-01 | 1.224E-01       |
| rs3803369  | 15  | 49163121      | A            | 0.855           | 1.428 [0.998-2.042] | 0.193       | 0.143          | 5.227E-02 | 6.017E-02       |
| rs893576   | 15  | 49224953      | G            | 1.000           | 1.188 [0.813-1.735] | 0.161       | 0.139          | 3.695E-01 | 3.848E-01       |
| rs4775919  | 15  | 49233201      | G            | 1.000           | 1.223 [0.839-1.781] | 0.165       | 0.139          | 2.906E-01 | 3.061E-01       |
| rs8041933  | 15  | 49405038      | A            | 0.880           | 0.997 [0.697-1.427] | 0.182       | 0.183          | 9.886E-01 | 9.889E-01       |
| rs288579   | 16  | 61135127      | G            | 0.323           | 1.721 [1.162-2.548] | 0.161       | 0.101          | 7.053E-03 | 9.077E-03       |
| rs12447462 | 16  | 63038923      | G            | 0.805           | 1.999 [1.367-2.924] | 0.181       | 0.100          | 3.084E-04 | 4.752E-04       |
| rs7193343  | 16  | 71586661      | A            | 1.000           | 0.899 [0.620-1.304] | 0.161       | 0.176          | 5.760E-01 | 5.881E-01       |
| rs8059522  | 16  | 78014317      | G            | 0.597           | 1.799 [1.286-2.518] | 0.240       | 0.149          | 4.435E-04 | 6.693E-04       |
| rs4782905  | 16  | 82813923      | A            | 0.744           | 0.057 [0.008-0.415] | 0.005       | 0.074          | 1.252E-04 | 2.038E-04       |
| rs2240601  | 17  | 53106111      | A            | 0.065           | 2.019 [1.477-2.760] | 0.303       | 0.177          | 1.248E-05 | 2.325E-05       |
| rs1941384  | 18  | 23988934      | A            | 0.856           | 1.140 [0.782-1.664] | 0.161       | 0.144          | 4.906E-01 | 5.044E-01       |
| rs713042   | 19  | 1308082       | A            | 0.228           | 1.822 [1.329-2.498] | 0.287       | 0.181          | 1.487E-04 | 2.392E-04       |
| rs3826942  | 19  | 1311575       | G            | 0.532           | 1.576 [1.165-2.133] | 0.321       | 0.231          | 3.030E-03 | 4.092E-03       |
| rs8109578  | 19  | 10074154      | A            | 1.000           | 0.305 [0.146-0.634] | 0.036       | 0.108          | 1.053E-03 | 1.513E-03       |
| rs1629174  | 19  | 44578058      | A            | 1.000           | 2.703 [1.647-4.437] | 0.110       | 0.044          | 4.617E-05 | 7.960E-05       |
| rs2210455  | 20  | 9867383       | A            | 1.000           | 1.289 [0.917-1.813] | 0.216       | 0.176          | 1.409E-01 | 1.539E-01       |
| rs6089151  | 20  | 30080496      | A            | 0.711           | N.D.                | 0.000       | 0.063          | 6.250E-05 | 1.056E-04       |
| rs6057638  | 20  | 30802993      | A            | 0.342           | 1.866 [1.354-2.572] | 0.276       | 0.169          | 5.882E-05 | 1.000E-04       |
| rs6141829  | 20  | 30902870      | G            | 0.393           | 2.018 [1.456-2.797] | 0.268       | 0.153          | 8.231E-06 | 1.576E-05       |
| rs2000291  | 20  | 30923196      | A            | 0.582           | 2.336 [1.686-3.237] | 0.279       | 0.142          | 8.588E-08 | 2.157E-07       |
| rs1936307  | 20  | 30993189      | A            | 0.245           | 1.870 [1.401-2.497] | 0.409       | 0.270          | 2.306E-05 | 4.141E-05       |
| rs2827771  | 21  | 23231640      | G            | 1.000           | 1.267 [0.857-1.872] | 0.153       | 0.125          | 2.256E-01 | 2.405E-01       |
| rs2829505  | 21  | 25307597      | A            | 0.848           | 1.530 [1.157-2.023] | 0.476       | 0.372          | 2.820E-03 | 3.824E-03       |
| rs3746887  | 21  | 39954610      | A            | 0.786           | 0.504 [0.328-0.774] | 0.116       | 0.207          | 1.639E-03 | 2.292E-03       |
| rs2041629  | 22  | 15937144      | A            | 0.370           | 1.038 [0.730-1.477] | 0.189       | 0.183          | 8.386E-01 | 8.436E-01       |
| rs433576   | 22  | 16828960      | A            | 0.114           | 0.417 [0.272-0.638] | 0.117       | 0.242          | 8.976E-05 | 1.489E-04       |
| rs390407   | 22  | 21588231      | G            | 0.340           | 0.450 [0.304-0.667] | 0.132       | 0.252          | 4.475E-05 | 7.726E-05       |
| rs740234   | 22  | 29338745      | G            | 0.869           | 2.041 [1.482-2.812] | 0.283       | 0.162          | 7.816E-06 | 1.500E-05       |
| rs5916793  | X   | 107034204     | C            | 1.000           | 3.120 [1.146-8.489] | 0.037       | 0.012          | 3.735E-05 | 6.528E-05       |
| rs4933045  | XY  | 214201        | A            | 0.392           | 1.786 [1.341-2.378] | 0.435       | 0.301          | 8.527E-05 | 1.417E-04       |

**Supplementary Table 2C. Top ranking hits in stratified subsets of cases with only psoriatic arthritis. MapInfo is location from hg18. OR (odds ratio with the 95% CI). Minor allele frequencies for cases and controls and Trend P values (unadjusted and adjusted by GC) are also provided.**

| RS #       | CHR | MapInfo (bp) | Minor Allele | HW P (controls) | Psoriatic Arthritis  |            |               |           |                |
|------------|-----|--------------|--------------|-----------------|----------------------|------------|---------------|-----------|----------------|
|            |     |              |              |                 | OR                   | MAF(cases) | MAF(controls) | Trend P   | Trend P (adj.) |
| rs880051   | 1   | 1483590      | A            | 0.594           | 2.095 [1.471-2.984]  | 0.370      | 0.219         | 3.937E-05 | 6.221E-05      |
| rs10914850 | 1   | 34268681     | G            | 1.000           | 0.789 [0.331-1.880]  | 0.036      | 0.045         | 5.915E-01 | 6.012E-01      |
| rs4653108  | 1   | 35100619     | A            | 0.762           | 1.162 [0.771-1.749]  | 0.202      | 0.179         | 4.769E-01 | 4.884E-01      |
| rs11207808 | 1   | 61919026     | A            | 0.674           | 0.765 [0.524-1.117]  | 0.250      | 0.303         | 1.666E-01 | 1.779E-01      |
| rs12130439 | 1   | 61943203     | A            | 0.659           | 0.823 [0.564-1.200]  | 0.244      | 0.282         | 3.128E-01 | 3.255E-01      |
| rs1506399  | 1   | 63946072     | C            | 1.000           | 1.230 [0.415-3.645]  | 0.024      | 0.020         | 7.054E-01 | 7.126E-01      |
| rs930145   | 1   | 68402118     | G            | 0.705           | 1.222 [0.780-1.916]  | 0.161      | 0.135         | 3.767E-01 | 3.892E-01      |
| rs1408668  | 1   | 86264437     | G            | 0.289           | 1.766 [1.216-2.565]  | 0.280      | 0.180         | 3.136E-03 | 4.009E-03      |
| rs1356394  | 1   | 102829858    | A            | 0.711           | 0.097 [0.013-0.708]  | 0.006      | 0.063         | 3.908E-03 | 4.945E-03      |
| rs316941   | 1   | 104912966    | G            | 0.628           | 2.396 [1.572-3.652]  | 0.214      | 0.102         | 4.143E-05 | 6.540E-05      |
| rs12066799 | 1   | 109321084    | A            | 0.590           | 0.602 [0.426-0.850]  | 0.337      | 0.458         | 3.707E-03 | 4.702E-03      |
| rs1217401  | 1   | 114240474    | G            | 0.273           | 1.793 [1.282-2.509]  | 0.417      | 0.285         | 6.778E-04 | 9.318E-04      |
| rs971173   | 1   | 114249437    | A            | 0.226           | 1.806 [1.290-2.527]  | 0.417      | 0.283         | 6.005E-04 | 8.326E-04      |
| rs10494809 | 1   | 198398707    | A            | 0.759           | 1.856 [1.280-2.692]  | 0.286      | 0.177         | 1.056E-03 | 1.419E-03      |
| rs7520626  | 1   | 202488465    | C            | 0.132           | 0.801 [0.567-1.130]  | 0.333      | 0.384         | 1.968E-01 | 2.087E-01      |
| rs2802846  | 1   | 203249336    | A            | 0.394           | 1.957 [1.403-2.729]  | 0.452      | 0.297         | 7.735E-05 | 1.183E-04      |
| rs11800413 | 1   | 235069500    | G            | 0.372           | 1.991 [1.429-2.775]  | 0.524      | 0.356         | 5.959E-05 | 9.200E-05      |
| rs6428942  | 1   | 243885338    | G            | 1.000           | 2.227 [1.511-3.282]  | 0.262      | 0.137         | 4.639E-05 | 7.267E-05      |
| rs4246561  | 2   | 1142434      | G            | 0.166           | 3.337 [1.894-5.878]  | 0.119      | 0.039         | 1.346E-05 | 2.244E-05      |
| rs921322   | 2   | 11237111     | A            | 0.046           | 1.942 [1.389-2.715]  | 0.602      | 0.438         | 5.404E-05 | 8.405E-05      |
| rs162330   | 2   | 38173000     | C            | 0.149           | 1.840 [1.310-2.585]  | 0.611      | 0.461         | 5.967E-04 | 8.242E-04      |
| rs13032336 | 2   | 67568265     | A            | 0.236           | 1.801 [1.193-2.718]  | 0.214      | 0.131         | 3.582E-03 | 4.552E-03      |
| rs1518722  | 2   | 87410648     | C            | 0.617           | 0.139 [0.019-1.012]  | 0.007      | 0.047         | 1.992E-02 | 2.337E-02      |
| rs6749984  | 2   | 124156863    | G            | 1.000           | 3.174 [1.730-5.827]  | 0.102      | 0.035         | 6.151E-05 | 9.481E-05      |
| rs1439563  | 2   | 188566032    | G            | 0.773           | 1.452 [0.865-2.434]  | 0.119      | 0.085         | 1.570E-01 | 1.680E-01      |
| rs13432541 | 2   | 233817248    | A            | 0.642           | 2.816 [1.675-4.736]  | 0.137      | 0.053         | 5.727E-05 | 8.882E-05      |
| rs2697135  | 3   | 11052898     | A            | 0.310           | 0.454 [0.225-0.913]  | 0.062      | 0.126         | 2.226E-02 | 2.598E-02      |
| rs12487468 | 3   | 51364610     | G            | 1.000           | 4.476 [1.954-10.250] | 0.060      | 0.014         | 9.547E-05 | 1.447E-04      |
| rs1461796  | 3   | 55199120     | A            | 0.548           | 1.652 [1.133-2.410]  | 0.268      | 0.181         | 7.877E-03 | 9.645E-03      |
| rs4974135  | 3   | 56353303     | A            | 1.000           | 3.926 [1.926-8.002]  | 0.077      | 0.021         | 4.173E-05 | 6.573E-05      |
| rs2193550  | 3   | 70538343     | C            | 0.063           | 1.677 [1.158-2.427]  | 0.286      | 0.193         | 4.603E-03 | 5.780E-03      |
| rs1164059  | 3   | 110942724    | A            | 0.753           | 0.767 [0.529-1.114]  | 0.259      | 0.313         | 1.683E-01 | 1.796E-01      |



| RS #       | CHR | MapInfo (bp) | Minor Allele | HW P (controls) | Psoriatic Arthritis |            |               |           |                |
|------------|-----|--------------|--------------|-----------------|---------------------|------------|---------------|-----------|----------------|
|            |     |              |              |                 | OR                  | MAF(cases) | MAF(controls) | Trend P   | Trend P (adj.) |
| rs6779681  | 3   | 138884283    | G            | 0.471           | 1.022 [0.700-1.490] | 0.250      | 0.246         | 9.106E-01 | 9.129E-01      |
| rs10513502 | 3   | 158184555    | A            | 0.439           | 3.424 [1.885-6.217] | 0.107      | 0.034         | 2.689E-05 | 4.317E-05      |
| rs3792686  | 4   | 4443969      | G            | 0.313           | 1.418 [1.022-1.968] | 0.506      | 0.419         | 3.900E-02 | 4.436E-02      |
| rs13125385 | 4   | 32113322     | A            | 0.199           | 2.506 [1.578-3.981] | 0.173      | 0.077         | 9.080E-05 | 1.376E-04      |
| rs13151961 | 4   | 123334952    | G            | 0.112           | 0.570 [0.348-0.933] | 0.119      | 0.192         | 2.953E-02 | 3.403E-02      |
| rs6822844  | 4   | 123728871    | A            | 0.054           | 0.527 [0.315-0.880] | 0.107      | 0.186         | 1.786E-02 | 2.106E-02      |
| rs6840978  | 4   | 123774157    | A            | 0.053           | 0.607 [0.387-0.952] | 0.149      | 0.224         | 3.650E-02 | 4.164E-02      |
| rs10519368 | 4   | 136925018    | A            | 0.757           | 1.604 [0.953-2.701] | 0.119      | 0.078         | 7.276E-02 | 8.049E-02      |
| rs2612182  | 4   | 137918325    | A            | 0.298           | N.D.                | 0.000      | 0.071         | 1.676E-03 | 2.208E-03      |
| rs4296721  | 4   | 157328717    | A            | 0.591           | 3.451 [2.002-5.949] | 0.131      | 0.042         | 2.787E-06 | 5.006E-06      |
| rs6835397  | 4   | 187930570    | A            | 0.650           | 0.739 [0.528-1.033] | 0.381      | 0.454         | 7.234E-02 | 8.006E-02      |
| rs10062995 | 5   | 25448500     | A            | 0.075           | 2.079 [1.433-3.015] | 0.292      | 0.165         | 7.665E-05 | 1.171E-04      |
| rs10036252 | 5   | 25487576     | G            | 0.101           | 2.305 [1.515-3.508] | 0.214      | 0.106         | 6.198E-05 | 9.577E-05      |
| rs6883825  | 5   | 36460847     | A            | 0.921           | 1.068 [0.758-1.505] | 0.351      | 0.336         | 7.063E-01 | 7.136E-01      |
| rs10515168 | 5   | 73242423     | A            | 1.000           | 2.602 [1.599-4.235] | 0.155      | 0.066         | 6.338E-05 | 9.771E-05      |
| rs152599   | 5   | 106807204    | A            | 0.023           | 1.590 [1.142-2.212] | 0.458      | 0.347         | 8.966E-03 | 1.091E-02      |
| rs1002916  | 5   | 117962940    | G            | 0.536           | 3.155 [1.776-5.606] | 0.113      | 0.039         | 4.791E-05 | 7.489E-05      |
| rs4129371  | 5   | 120480755    | A            | 0.280           | 2.196 [1.452-3.320] | 0.223      | 0.115         | 2.012E-04 | 2.934E-04      |
| rs13436259 | 5   | 120502430    | A            | 0.353           | 2.314 [1.527-3.506] | 0.220      | 0.109         | 6.697E-05 | 1.033E-04      |
| rs7726945  | 5   | 128062298    | A            | 1.000           | 0.386 [0.229-0.651] | 0.101      | 0.226         | 2.354E-04 | 3.399E-04      |
| rs4868753  | 5   | 164582872    | G            | 0.503           | 1.967 [1.411-2.743] | 0.537      | 0.370         | 4.633E-05 | 7.267E-05      |
| rs4367315  | 5   | 164593117    | G            | 0.923           | 1.955 [1.406-2.720] | 0.536      | 0.371         | 5.999E-05 | 9.293E-05      |
| rs1422680  | 5   | 164598962    | G            | 0.389           | 1.908 [1.373-2.651] | 0.530      | 0.371         | 8.467E-05 | 1.288E-04      |
| rs3846949  | 6   | 15479222     | A            | 0.757           | 1.230 [0.874-1.730] | 0.363      | 0.317         | 2.375E-01 | 2.500E-01      |
| rs4713380  | 6   | 30893252     | G            | 0.057           | 1.928 [1.309-2.840] | 0.256      | 0.151         | 1.063E-03 | 1.434E-03      |
| rs4713385  | 6   | 30895572     | A            | 0.057           | 1.928 [1.309-2.840] | 0.256      | 0.151         | 1.063E-03 | 1.434E-03      |
| rs7756521  | 6   | 30956232     | G            | 1.000           | 1.908 [1.327-2.743] | 0.309      | 0.190         | 3.560E-04 | 5.051E-04      |
| rs1264323  | 6   | 30963886     | A            | 0.781           | 1.762 [1.269-2.448] | 0.542      | 0.401         | 6.516E-04 | 8.990E-04      |
| rs1049623  | 6   | 30972808     | G            | 0.781           | 1.762 [1.269-2.448] | 0.542      | 0.401         | 6.516E-04 | 8.990E-04      |
| rs3873332  | 6   | 31003969     | G            | 1.000           | 1.907 [1.290-2.819] | 0.256      | 0.153         | 8.194E-04 | 1.115E-03      |
| rs3873334  | 6   | 31004126     | A            | 0.749           | 1.821 [1.246-2.661] | 0.268      | 0.167         | 1.522E-03 | 2.016E-03      |
| rs2532924  | 6   | 31040661     | A            | 0.783           | 0.565 [0.396-0.807] | 0.292      | 0.421         | 1.547E-03 | 2.047E-03      |
| rs3871466  | 6   | 31091662     | G            | 0.430           | 2.033 [1.359-3.041] | 0.232      | 0.129         | 4.079E-04 | 5.736E-04      |
| rs2523898  | 6   | 31101512     | A            | 0.417           | 0.542 [0.383-0.766] | 0.331      | 0.478         | 3.322E-04 | 4.728E-04      |
| rs3130955  | 6   | 31162490     | A            | 0.211           | 1.541 [1.109-2.141] | 0.470      | 0.365         | 7.960E-03 | 9.743E-03      |



| RS #       | CHR | MapInfo (bp) | Minor Allele | HW P (controls) | Psoriatic Arthritis |            |               |           |                |
|------------|-----|--------------|--------------|-----------------|---------------------|------------|---------------|-----------|----------------|
|            |     |              |              |                 | OR                  | MAF(cases) | MAF(controls) | Trend P   | Trend P (adj.) |
| rs2233956  | 6   | 31189184     | G            | 0.879           | 1.867 [1.289-2.704] | 0.292      | 0.181         | 8.866E-04 | 1.204E-03      |
| rs3094211  | 6   | 31194381     | G            | 0.904           | 0.439 [0.266-0.725] | 0.125      | 0.245         | 9.825E-04 | 1.328E-03      |
| rs3094205  | 6   | 31199841     | G            | 0.838           | 1.492 [1.069-2.084] | 0.417      | 0.324         | 1.719E-02 | 2.030E-02      |
| rs3131003  | 6   | 31201461     | A            | 0.928           | 1.668 [1.200-2.319] | 0.565      | 0.438         | 2.174E-03 | 2.827E-03      |
| rs3815087  | 6   | 31201566     | A            | 0.443           | 1.993 [1.396-2.844] | 0.367      | 0.225         | 1.057E-04 | 1.592E-04      |
| rs746647   | 6   | 31222161     | G            | 0.413           | 1.758 [1.262-2.449] | 0.452      | 0.320         | 6.302E-04 | 8.719E-04      |
| rs1265112  | 6   | 31225998     | G            | 0.413           | 1.758 [1.262-2.449] | 0.452      | 0.320         | 6.302E-04 | 8.719E-04      |
| rs130065   | 6   | 31230479     | A            | 0.295           | 2.139 [1.497-3.056] | 0.378      | 0.221         | 4.190E-05 | 6.606E-05      |
| rs3130453  | 6   | 31232828     | G            | 0.284           | 0.490 [0.348-0.690] | 0.339      | 0.512         | 2.629E-05 | 4.231E-05      |
| rs720465   | 6   | 31233756     | A            | 0.396           | 2.158 [1.549-3.006] | 0.482      | 0.301         | 3.307E-06 | 5.895E-06      |
| rs1419881  | 6   | 31238572     | A            | 0.786           | 1.648 [1.185-2.291] | 0.565      | 0.441         | 3.022E-03 | 3.871E-03      |
| rs1265159  | 6   | 31248026     | A            | 0.614           | 2.332 [1.659-3.279] | 0.411      | 0.230         | 6.546E-07 | 1.267E-06      |
| rs3130473  | 6   | 31307187     | A            | 0.573           | 2.308 [1.653-3.222] | 0.464      | 0.273         | 1.162E-06 | 2.181E-06      |
| rs3130685  | 6   | 31314185     | A            | 0.786           | 1.563 [1.123-2.175] | 0.554      | 0.443         | 8.230E-03 | 1.005E-02      |
| rs2394963  | 6   | 31359441     | A            | 0.144           | 0.364 [0.224-0.593] | 0.120      | 0.273         | 4.883E-05 | 7.640E-05      |
| rs3873379  | 6   | 31370148     | G            | 0.177           | 0.379 [0.235-0.611] | 0.125      | 0.274         | 6.987E-05 | 1.075E-04      |
| rs2894207  | 6   | 31371730     | G            | 0.895           | 1.903 [1.338-2.705] | 0.345      | 0.217         | 2.819E-04 | 4.038E-04      |
| rs9366778  | 6   | 31377152     | A            | 0.136           | 0.427 [0.290-0.628] | 0.220      | 0.398         | 2.049E-05 | 3.345E-05      |
| rs10484554 | 6   | 31382534     | A            | 0.234           | 2.526 [1.752-3.643] | 0.321      | 0.158         | 5.794E-07 | 1.126E-06      |
| rs2523619  | 6   | 31426123     | G            | 0.809           | 1.633 [1.152-2.316] | 0.345      | 0.244         | 5.514E-03 | 6.863E-03      |
| rs2596503  | 6   | 31428789     | A            | 1.000           | 0.408 [0.216-0.772] | 0.073      | 0.162         | 4.771E-03 | 5.981E-03      |
| rs2523608  | 6   | 31430538     | G            | 0.565           | 1.505 [1.076-2.106] | 0.469      | 0.369         | 1.479E-02 | 1.759E-02      |
| rs7743761  | 6   | 31444079     | A            | 0.718           | 1.703 [1.204-2.408] | 0.357      | 0.246         | 2.980E-03 | 3.818E-03      |
| rs2523535  | 6   | 31444229     | G            | 0.781           | 0.691 [0.487-0.980] | 0.319      | 0.404         | 3.611E-02 | 4.122E-02      |
| rs2844529  | 6   | 31461572     | A            | 0.433           | 1.564 [1.123-2.179] | 0.458      | 0.351         | 9.243E-03 | 1.123E-02      |
| rs2428486  | 6   | 31462083     | G            | 0.433           | 1.605 [1.154-2.232] | 0.464      | 0.351         | 5.634E-03 | 7.006E-03      |
| rs13437082 | 6   | 31462539     | A            | 0.642           | 2.057 [1.465-2.889] | 0.416      | 0.257         | 3.146E-05 | 5.016E-05      |
| rs4711269  | 6   | 31462798     | A            | 0.642           | 2.116 [1.511-2.965] | 0.423      | 0.257         | 1.345E-05 | 2.233E-05      |
| rs2523467  | 6   | 31470909     | A            | 0.327           | 1.523 [1.091-2.126] | 0.451      | 0.351         | 1.527E-02 | 1.812E-02      |
| rs1051794  | 6   | 31487088     | A            | 0.408           | 1.608 [1.152-2.246] | 0.423      | 0.313         | 5.668E-03 | 7.047E-03      |
| rs1131896  | 6   | 31487094     | A            | 0.103           | 0.363 [0.218-0.604] | 0.112      | 0.259         | 1.210E-04 | 1.806E-04      |
| rs7772549  | 6   | 31515622     | G            | 0.264           | 1.576 [1.126-2.205] | 0.433      | 0.326         | 9.089E-03 | 1.106E-02      |
| rs9469003  | 6   | 31515807     | G            | 0.281           | 1.882 [1.270-2.789] | 0.244      | 0.146         | 1.839E-03 | 2.411E-03      |
| rs2596480  | 6   | 31533964     | A            | 0.606           | 0.287 [0.115-0.716] | 0.030      | 0.097         | 3.851E-03 | 4.875E-03      |
| rs2395029  | 6   | 31539759     | C            | 1.000           | 2.813 [1.523-5.194] | 0.095      | 0.036         | 4.311E-04 | 6.067E-04      |

|            |     |              |              |                 | Psoriatic Arthritis |            |               |           |                |
|------------|-----|--------------|--------------|-----------------|---------------------|------------|---------------|-----------|----------------|
| RS #       | CHR | MapInfo (bp) | Minor Allele | HW P (controls) | OR                  | MAF(cases) | MAF(controls) | Trend P   | Trend P (adj.) |
| rs2248462  | 6   | 31554775     | A            | 0.901           | 1.574 [1.102-2.247] | 0.325      | 0.234         | 1.216E-02 | 1.459E-02      |
| rs2516509  | 6   | 31557973     | G            | 0.901           | 1.563 [1.092-2.237] | 0.323      | 0.234         | 1.434E-02 | 1.707E-02      |
| rs2844509  | 6   | 31618903     | G            | 0.738           | 1.341 [0.947-1.899] | 0.339      | 0.277         | 1.020E-01 | 1.111E-01      |
| rs9368699  | 6   | 31910520     | G            | 1.000           | 2.021 [1.057-3.865] | 0.077      | 0.040         | 2.638E-02 | 3.054E-02      |
| rs12198173 | 6   | 32134786     | A            | 0.594           | 1.983 [1.253-3.137] | 0.167      | 0.092         | 3.220E-03 | 4.113E-03      |
| rs13199524 | 6   | 32174743     | A            | 0.571           | 1.961 [1.222-3.146] | 0.158      | 0.088         | 5.155E-03 | 6.439E-03      |
| rs12153855 | 6   | 32182782     | G            | 0.819           | 1.877 [1.211-2.909] | 0.184      | 0.108         | 4.223E-03 | 5.325E-03      |
| rs3096697  | 6   | 32242488     | A            | 0.194           | 1.997 [1.407-2.834] | 0.361      | 0.221         | 7.129E-05 | 1.091E-04      |
| rs3134945  | 6   | 32254470     | A            | 0.156           | 1.979 [1.394-2.808] | 0.361      | 0.222         | 8.533E-05 | 1.295E-04      |
| rs8192591  | 6   | 32293774     | A            | 1.000           | 2.451 [1.292-4.651] | 0.084      | 0.036         | 3.831E-03 | 4.852E-03      |
| rs2395185  | 6   | 32541145     | A            | 0.832           | 1.541 [1.098-2.163] | 0.398      | 0.300         | 1.170E-02 | 1.406E-02      |
| rs560788   | 6   | 52938820     | A            | 0.523           | 1.710 [1.231-2.376] | 0.554      | 0.420         | 1.321E-03 | 1.762E-03      |
| rs10484710 | 6   | 56213713     | A            | 0.110           | N.D.                | 0.000      | 0.062         | 2.284E-03 | 2.964E-03      |
| rs346298   | 6   | 80630001     | A            | 0.075           | 2.127 [1.508-3.000] | 0.387      | 0.229         | 3.226E-05 | 5.143E-05      |
| rs7754913  | 6   | 132423548    | C            | 0.689           | 2.209 [1.484-3.289] | 0.244      | 0.127         | 8.445E-05 | 1.282E-04      |
| rs12182899 | 6   | 148982366    | G            | 0.904           | 0.840 [0.566-1.248] | 0.214      | 0.245         | 3.818E-01 | 3.943E-01      |
| rs6557200  | 6   | 150314225    | G            | 0.108           | 1.959 [1.325-2.896] | 0.253      | 0.147         | 3.647E-04 | 5.181E-04      |
| rs4719601  | 7   | 2610133      | A            | 0.541           | 0.402 [0.261-0.619] | 0.161      | 0.323         | 2.282E-05 | 3.697E-05      |
| rs10244600 | 7   | 16206679     | C            | 0.085           | 1.284 [0.907-1.819] | 0.354      | 0.299         | 1.798E-01 | 1.914E-01      |
| rs1404398  | 7   | 16628533     | A            | 0.292           | 2.323 [1.592-3.391] | 0.289      | 0.149         | 1.715E-05 | 2.823E-05      |
| rs156301   | 7   | 24190049     | A            | 0.312           | 0.507 [0.330-0.779] | 0.167      | 0.283         | 2.124E-03 | 2.766E-03      |
| rs12535722 | 7   | 129259292    | A            | 1.000           | N.D.                | 0.000      | 0.084         | 3.278E-04 | 4.680E-04      |
| rs1484646  | 8   | 10065806     | A            | 0.202           | 0.605 [0.405-0.903] | 0.207      | 0.302         | 1.041E-02 | 1.258E-02      |
| rs4150895  | 8   | 86292487     | A            | 0.619           | N.D.                | 0.000      | 0.048         | 5.161E-03 | 6.446E-03      |
| rs39519    | 8   | 90915209     | A            | 1.000           | 1.673 [1.205-2.324] | 0.494      | 0.368         | 2.020E-03 | 2.636E-03      |
| rs1827656  | 8   | 122260569    | A            | 1.000           | 2.791 [1.662-4.686] | 0.137      | 0.054         | 5.020E-05 | 7.834E-05      |
| rs1847547  | 8   | 122260683    | A            | 1.000           | 2.940 [1.726-5.009] | 0.132      | 0.049         | 3.422E-05 | 5.434E-05      |
| rs4733741  | 8   | 130857730    | A            | 0.701           | 0.525 [0.359-0.768] | 0.232      | 0.365         | 8.315E-04 | 1.132E-03      |
| rs7024449  | 9   | 691026       | A            | 0.369           | 0.402 [0.262-0.615] | 0.169      | 0.336         | 3.048E-05 | 4.867E-05      |
| rs4740820  | 9   | 5600381      | A            | 1.000           | 0.862 [0.588-1.263] | 0.238      | 0.266         | 4.417E-01 | 4.537E-01      |
| rs7042098  | 9   | 27815454     | A            | 0.447           | 1.014 [0.708-1.453] | 0.292      | 0.289         | 9.402E-01 | 9.418E-01      |
| rs823918   | 9   | 103703117    | C            | 0.069           | 1.596 [1.041-2.447] | 0.190      | 0.128         | 3.851E-02 | 4.384E-02      |
| rs10793992 | 9   | 133139159    | A            | 0.194           | 0.683 [0.482-0.966] | 0.321      | 0.410         | 2.616E-02 | 3.029E-02      |
| rs10901365 | 9   | 133150374    | A            | 0.263           | 0.627 [0.437-0.899] | 0.296      | 0.402         | 8.694E-03 | 1.059E-02      |
| rs1382580  | 10  | 23372821     | G            | 0.358           | 0.223 [0.097-0.513] | 0.036      | 0.142         | 1.013E-04 | 1.529E-04      |

| RS #       | CHR | MapInfo (bp) | Minor Allele | HW P (controls) | Psoriatic Arthritis |            |               |           |                |
|------------|-----|--------------|--------------|-----------------|---------------------|------------|---------------|-----------|----------------|
|            |     |              |              |                 | OR                  | MAF(cases) | MAF(controls) | Trend P   | Trend P (adj.) |
| rs384037   | 11  | 2869129      | G            | 0.083           | 0.474 [0.329-0.683] | 0.262      | 0.428         | 3.053E-05 | 4.892E-05      |
| rs1365057  | 11  | 35066251     | A            | 0.793           | 0.892 [0.592-1.343] | 0.196      | 0.215         | 5.804E-01 | 5.902E-01      |
| rs11605924 | 11  | 45829667     | A            | 0.204           | 0.564 [0.399-0.797] | 0.362      | 0.502         | 1.504E-03 | 1.995E-03      |
| rs1447170  | 11  | 57632797     | G            | 0.279           | 2.258 [1.375-3.711] | 0.143      | 0.069         | 1.191E-03 | 1.598E-03      |
| rs10736719 | 11  | 61756322     | G            | 0.410           | 1.328 [0.946-1.862] | 0.381      | 0.317         | 9.727E-02 | 1.063E-01      |
| rs3850942  | 11  | 63364623     | G            | 0.106           | 3.085 [1.824-5.217] | 0.137      | 0.049         | 1.410E-05 | 2.336E-05      |
| rs495366   | 11  | 102200318    | A            | 0.477           | 1.524 [1.074-2.162] | 0.339      | 0.252         | 1.859E-02 | 2.187E-02      |
| rs2661969  | 11  | 134223427    | G            | 0.895           | 1.154 [0.784-1.697] | 0.238      | 0.213         | 4.730E-01 | 4.846E-01      |
| rs1040092  | 12  | 58052436     | A            | 0.823           | 2.282 [1.513-3.441] | 0.226      | 0.113         | 5.871E-05 | 9.108E-05      |
| rs7957738  | 12  | 58057308     | A            | 1.000           | 2.339 [1.562-3.501] | 0.241      | 0.119         | 2.161E-05 | 3.517E-05      |
| rs1607784  | 12  | 76246319     | A            | 0.456           | 1.808 [1.147-2.851] | 0.167      | 0.100         | 9.265E-03 | 1.126E-02      |
| rs995030   | 12  | 87414802     | A            | 0.337           | 1.876 [1.286-2.737] | 0.274      | 0.167         | 1.111E-03 | 1.494E-03      |
| rs1022034  | 12  | 87442874     | A            | 0.337           | 1.933 [1.328-2.814] | 0.280      | 0.167         | 5.805E-04 | 8.034E-04      |
| rs3782181  | 12  | 87477692     | C            | 0.444           | 2.037 [1.411-2.939] | 0.304      | 0.176         | 1.451E-04 | 2.155E-04      |
| rs3886972  | 12  | 92161554     | A            | 0.245           | 1.512 [0.609-3.757] | 0.036      | 0.024         | 3.795E-01 | 3.920E-01      |
| rs10840624 | 12  | 120785682    | G            | 0.703           | 1.792 [1.288-2.493] | 0.518      | 0.375         | 4.773E-04 | 6.684E-04      |
| rs2760908  | 13  | 26844485     | G            | 0.897           | 2.015 [1.422-2.854] | 0.363      | 0.221         | 6.412E-05 | 9.870E-05      |
| rs12864419 | 13  | 28053904     | C            | 0.717           | 0.673 [0.478-0.947] | 0.345      | 0.439         | 2.437E-02 | 2.832E-02      |
| rs1186468  | 13  | 38847162     | A            | 0.545           | 0.638 [0.437-0.932] | 0.238      | 0.329         | 1.871E-02 | 2.201E-02      |
| rs4514547  | 13  | 39136899     | G            | 0.923           | 0.631 [0.436-0.914] | 0.259      | 0.357         | 1.465E-02 | 1.743E-02      |
| rs4569133  | 13  | 39137044     | A            | 0.923           | 0.621 [0.429-0.899] | 0.256      | 0.357         | 1.138E-02 | 1.369E-02      |
| rs7993214  | 13  | 39248912     | A            | 0.629           | 0.627 [0.435-0.906] | 0.262      | 0.361         | 1.381E-02 | 1.647E-02      |
| rs9533755  | 13  | 43530210     | G            | 0.725           | 1.701 [0.996-2.907] | 0.113      | 0.070         | 5.122E-02 | 5.756E-02      |
| rs288726   | 13  | 106292420    | A            | 1.000           | 2.094 [1.462-2.998] | 0.327      | 0.189         | 4.822E-05 | 7.526E-05      |
| rs8018041  | 14  | 24520721     | G            | 0.850           | 0.755 [0.448-1.272] | 0.108      | 0.139         | 2.879E-01 | 3.007E-01      |
| rs1958589  | 14  | 33914127     | G            | 0.406           | 0.735 [0.418-1.291] | 0.091      | 0.120         | 2.702E-01 | 2.828E-01      |
| rs847506   | 14  | 35538760     | A            | 1.000           | 1.865 [1.125-3.094] | 0.132      | 0.076         | 1.214E-02 | 1.457E-02      |
| rs7153045  | 14  | 55911652     | G            | 0.097           | 1.784 [1.280-2.487] | 0.494      | 0.354         | 3.582E-04 | 5.076E-04      |
| rs1189046  | 14  | 55929403     | A            | 0.464           | 0.484 [0.336-0.699] | 0.262      | 0.423         | 7.182E-05 | 1.102E-04      |
| rs2128673  | 14  | 56358349     | A            | 0.271           | 1.780 [1.156-2.743] | 0.190      | 0.117         | 8.574E-03 | 1.046E-02      |
| rs431649   | 14  | 67647645     | G            | 0.033           | 1.127 [0.745-1.704] | 0.196      | 0.178         | 5.881E-01 | 5.978E-01      |
| rs372143   | 14  | 67657091     | G            | 0.033           | 1.127 [0.745-1.704] | 0.196      | 0.178         | 5.881E-01 | 5.978E-01      |
| rs2588833  | 14  | 67669245     | A            | 0.065           | 1.134 [0.750-1.715] | 0.196      | 0.177         | 5.655E-01 | 5.756E-01      |
| rs2588832  | 14  | 67672520     | C            | 0.076           | 1.207 [0.808-1.804] | 0.214      | 0.184         | 3.756E-01 | 3.881E-01      |
| rs1742501  | 14  | 68398902     | G            | 0.735           | 3.242 [2.075-5.066] | 0.202      | 0.073         | 1.275E-07 | 2.676E-07      |

| RS #       | CHR | MapInfo (bp) | Minor Allele | HW P (controls) | Psoriatic Arthritis  |            |               |           |                |
|------------|-----|--------------|--------------|-----------------|----------------------|------------|---------------|-----------|----------------|
|            |     |              |              |                 | OR                   | MAF(cases) | MAF(controls) | Trend P   | Trend P (adj.) |
| rs17126387 | 14  | 89371067     | C            | 1.000           | 3.078 [1.657-5.720]  | 0.100      | 0.035         | 1.896E-04 | 2.775E-04      |
| rs6575501  | 14  | 94710082     | A            | 1.000           | 1.499 [0.780-2.882]  | 0.071      | 0.049         | 2.170E-01 | 2.292E-01      |
| rs11637031 | 15  | 48576417     | G            | 0.737           | 1.886 [1.285-2.767]  | 0.262      | 0.158         | 9.209E-04 | 1.248E-03      |
| rs8037553  | 15  | 48577525     | G            | 1.000           | 1.976 [1.345-2.905]  | 0.262      | 0.152         | 4.248E-04 | 5.975E-04      |
| rs4775912  | 15  | 49068271     | G            | 0.856           | 2.301 [1.574-3.365]  | 0.280      | 0.144         | 1.346E-05 | 2.244E-05      |
| rs3803369  | 15  | 49163121     | A            | 0.855           | 2.320 [1.586-3.393]  | 0.280      | 0.143         | 1.138E-05 | 1.914E-05      |
| rs893576   | 15  | 49224953     | G            | 1.000           | 2.327 [1.586-3.414]  | 0.274      | 0.139         | 9.291E-06 | 1.576E-05      |
| rs4775919  | 15  | 49233201     | G            | 1.000           | 2.397 [1.637-3.510]  | 0.280      | 0.139         | 3.764E-06 | 6.673E-06      |
| rs8041933  | 15  | 49405038     | A            | 0.880           | 2.059 [1.431-2.960]  | 0.315      | 0.183         | 8.755E-05 | 1.328E-04      |
| rs288579   | 16  | 61135127     | G            | 0.323           | 2.353 [1.538-3.600]  | 0.208      | 0.101         | 1.070E-04 | 1.608E-04      |
| rs12447462 | 16  | 63038923     | G            | 0.805           | 1.886 [1.202-2.959]  | 0.173      | 0.100         | 5.091E-03 | 6.361E-03      |
| rs7193343  | 16  | 71586661     | A            | 1.000           | 0.271 [0.136-0.542]  | 0.055      | 0.176         | 8.318E-05 | 1.269E-04      |
| rs8059522  | 16  | 78014317     | G            | 0.597           | 1.779 [1.198-2.641]  | 0.238      | 0.149         | 3.800E-03 | 4.814E-03      |
| rs4782905  | 16  | 82813923     | A            | 0.744           | 0.459 [0.182-1.155]  | 0.035      | 0.074         | 9.134E-02 | 1.000E-01      |
| rs2240601  | 17  | 53106111     | A            | 0.065           | 1.134 [0.750-1.715]  | 0.196      | 0.177         | 5.613E-01 | 5.715E-01      |
| rs1941384  | 18  | 23988934     | A            | 0.856           | 2.234 [1.524-3.273]  | 0.274      | 0.144         | 3.472E-05 | 5.516E-05      |
| rs713042   | 19  | 1308082      | A            | 0.228           | 1.761 [1.208-2.566]  | 0.280      | 0.181         | 2.477E-03 | 3.203E-03      |
| rs3826942  | 19  | 1311575      | G            | 0.532           | 1.755 [1.236-2.490]  | 0.345      | 0.231         | 1.367E-03 | 1.818E-03      |
| rs8109578  | 19  | 10074154     | A            | 1.000           | 0.108 [0.026-0.443]  | 0.013      | 0.108         | 1.989E-04 | 2.904E-04      |
| rs1629174  | 19  | 44578058     | A            | 1.000           | 1.529 [0.773-3.023]  | 0.065      | 0.044         | 2.168E-01 | 2.290E-01      |
| rs2210455  | 20  | 9867383      | A            | 1.000           | 2.091 [1.450-3.015]  | 0.309      | 0.176         | 7.201E-05 | 1.102E-04      |
| rs6089151  | 20  | 30080496     | A            | 0.711           | N.D.                 | 0.000      | 0.063         | 1.086E-03 | 1.464E-03      |
| rs6057638  | 20  | 30802993     | A            | 0.342           | 1.110 [0.727-1.695]  | 0.184      | 0.169         | 6.260E-01 | 6.349E-01      |
| rs6141829  | 20  | 30902870     | G            | 0.393           | 1.057 [0.677-1.651]  | 0.161      | 0.153         | 8.053E-01 | 8.103E-01      |
| rs2000291  | 20  | 30923196     | A            | 0.582           | 1.102 [0.700-1.736]  | 0.155      | 0.142         | 6.711E-01 | 6.792E-01      |
| rs1936307  | 20  | 30993189     | A            | 0.245           | 1.073 [0.741-1.553]  | 0.284      | 0.270         | 7.165E-01 | 7.235E-01      |
| rs2827771  | 21  | 23231640     | G            | 1.000           | 2.217 [1.481-3.318]  | 0.241      | 0.125         | 8.398E-05 | 1.276E-04      |
| rs2829505  | 21  | 25307597     | A            | 0.848           | 1.684 [1.213-2.339]  | 0.500      | 0.372         | 1.892E-03 | 2.477E-03      |
| rs3746887  | 21  | 39954610     | A            | 0.786           | 0.502 [0.304-0.828]  | 0.116      | 0.207         | 6.410E-03 | 7.925E-03      |
| rs2041629  | 22  | 15937144     | A            | 0.370           | 2.054 [1.429-2.951]  | 0.315      | 0.183         | 9.347E-05 | 1.418E-04      |
| rs433576   | 22  | 16828960     | A            | 0.114           | 0.899 [0.595-1.358]  | 0.223      | 0.242         | 6.279E-01 | 6.369E-01      |
| rs390407   | 22  | 21588231     | G            | 0.340           | 0.925 [0.631-1.357]  | 0.238      | 0.252         | 6.838E-01 | 6.916E-01      |
| rs740234   | 22  | 29338745     | G            | 0.869           | 1.261 [0.832-1.912]  | 0.196      | 0.162         | 2.662E-01 | 2.789E-01      |
| rs5916793  | X   | 107034204    | C            | 1.000           | 3.695 [1.293-10.550] | 0.044      | 0.012         | 2.946E-05 | 4.723E-05      |
| rs4933045  | XY  | 214201       | A            | 0.392           | 1.182 [0.829-1.685]  | 0.337      | 0.301         | 3.601E-01 | 3.727E-01      |
